# Supplementary material for: Obscuring effect of coding developmental disability as the underlying cause of death on mortality trends for adults with developmental disability: a cross-sectional study using US Mortality Data from 2012 to 2016
Source: PubMed Central journal article supplement — BMJ Open. 2019 Feb 24;9(2):e026614. doi: 10.1136/bmjopen-2018-026614 (PMC6443053; doi:10.1136/bmjopen-2018-026614), 2019-02-24
Supplement: bmjopen-2018-026614.draft_revisions.pdf [file bmjopen-2018-026614.draft_revisions.pdf]

# BMJ Open

BMJ Open is committed to open peer review. As part of this commitment we make the peer review history of every article we publish publicly available.

When an article is published we post the peer reviewers' comments and the authors' responses online. We also post the versions of the paper that were used during peer review. These are the versions that the peer review comments apply to.

The versions of the paper that follow are the versions that were submitted during the peer review process. They are not the versions of record or the final published versions. They should not be cited or distributed as the published version of this manuscript.

BMJ Open is an open access journal and the full, final, typeset and author-corrected version of record of the manuscript is available on our site with no access controls, subscription charges or pay-per-view fees (<http://bmjopen.bmj.com>).

If you have any questions on BMJ Open's open peer review process please email [info.bmjopen@bmj.com](mailto:info.bmjopen@bmj.com)

# BMJ Open

## The Obscuring Effect of Coding Developmental Disability as the Underlying Cause of Death on Mortality Trends for Adults with Developmental Disability: A Cross-Sectional Study Utilizing U.S. Mortality Data from 2012 to 2016

|                               |                                                                                                                                                                                                                                                                                            |
|-------------------------------|--------------------------------------------------------------------------------------------------------------------------------------------------------------------------------------------------------------------------------------------------------------------------------------------|
| Journal:                      | <i>BMJ Open</i>                                                                                                                                                                                                                                                                            |
| Manuscript ID                 | bmjopen-2018-026614                                                                                                                                                                                                                                                                        |
| Article Type:                 | Research                                                                                                                                                                                                                                                                                   |
| Date Submitted by the Author: | 11-Sep-2018                                                                                                                                                                                                                                                                                |
| Complete List of Authors:     | Landes, Scott; Syracuse University, Department of Sociology and Aging Studies Institute<br>Stevens, James; Syracuse University, Department of Sociology and Aging Studies Institute<br>Turk, Margaret; SUNY Upstate Medical University, Department of Physical Medicine and Rehabilitation |
| Keywords:                     | Developmental disability, Underlying cause of death, Mortality trends                                                                                                                                                                                                                      |
|                               |                                                                                                                                                                                                                                                                                            |

SCHOLARONE™  
Manuscripts

Peer Review Only

1  
2  
3  
4  
5  
6  
7  
8  
9  
10  
11  
12  
13  
14  
15  
16  
17 The Obscuring Effect of Coding Developmental Disability as the Underlying Cause of Death on  
18 Mortality Trends for Adults with Developmental Disability: A Cross-Sectional Study Utilizing  
19 U.S. Mortality Data from 2012 to 2016  
20  
21  
22  
23  
24  
25  
26  
27  
28  
29  
30

31  
32 Scott D. Landes, PhD<sup>1</sup>; J. Dalton Stevens, MA<sup>1</sup>; Margaret A. Turk, MD<sup>2</sup>  
33  
34  
35  
36  
37  
38  
39  
40

41 <sup>1</sup> Department of Sociology and Aging Studies Institute, Maxwell School of Citizenship and  
42 Public Affairs, Syracuse University

43 <sup>2</sup> Department of Physical Medicine and Rehabilitation, SUNY Upstate Medical Center  
44

45  
46 Corresponding Author: Scott D. Landes, PhD, Department of Sociology and Aging Studies  
47 Institute, Maxwell School of Citizenship and Public Affairs, Syracuse University, 314 Lyman  
48 Hall, Syracuse, NY 13244-1020, USA

49 Email: [sdlandes@maxwell.syr.edu](mailto:sdlandes@maxwell.syr.edu)  
50  
51

52  
53 Word count: 2,964  
54  
55  
56  
57

## Abstract

Objective: To determine whether coding a developmental disability as the underlying cause of death obscures mortality trends of adults with developmental disability.

Design: National Vital Statistics System 2012-2016 U.S. Multiple Cause-of-Death Mortality files.

Setting: United States.

Participants: Adults with a developmental disability indicated on their death certificate aged 18 through 103 at the time of death. The study population included 33,154 adults who died between January 1, 2012 and December 31, 2016.

Primary outcome and measures: Decedents with a developmental disability coded as the underlying cause of death on the death certificate were identified utilizing an ICD-10 code for intellectual disability, cerebral palsy, Down syndrome, or other developmental disability. Death certificates that coded a developmental disability as the underlying cause of death were revised utilizing a sequential underlying cause of death revision process.

Results: There were 33,154 decedents with developmental disability: 7,901 with intellectual disability, 11,895 with cerebral palsy, 9,114 with Down syndrome, 2,479 with other developmental disabilities, and 1,765 with multiple developmental disabilities. Among all decedents, 48.5% had a developmental disability coded as the underlying cause of death, obscuring higher rates of choking deaths among all decedents, and dementia and Alzheimer disease among decedents with Down syndrome.

Conclusion: Death certificates that recorded the developmental disability in Part I of the death certificate were more likely to code disability as the underlying cause of death. While revising these death certificates provides a short-term corrective to mortality trends for this population, the severity and extent of this problem warrants a long-term change involving more precise instructions to record developmental disabilities only in Part II of the death certificate.

### Strengths and limitations of this study

- This study revises death certificates that had developmental disability coded as underlying cause of death.
- This study provides evidence that coding developmental disability as underlying cause of death obscures often preventable, diseases or injuries other than disability that initiated the sequence of events leading to death.
- The high percentage of death certificates coded with a developmental disability as the underlying cause of death reveals the need to revise death certificates for adults with developmental disability prior to reporting mortality trends.
- Since the study population only includes decedents who had a developmental disability recorded on their death certificate, it is not inclusive of all decedents with a developmental disability in the U.S

1  
2  
3  
4  
5  
6  
7  
8  
9  
10  
11  
12  
13  
14  
15  
16  
17  
18  
19  
20  
21  
22  
23  
24  
25  
26  
27  
28  
29  
30  
31  
32  
33  
34  
35  
36  
37  
38  
39  
40  
41  
42  
43  
44  
45  
46  
47  
48  
49  
50  
51  
52  
53  
54  
55  
56  
57  
58  
59  
60

- Limitations to retrospective revising of death certificates highlight the need for a long-term solution involving formal changes to policies guiding coding of developmental disability on death certificates.

For peer review only

1  
2  
3 The Obscuring Effect of Coding Developmental Disability as the Underlying Cause of Death on  
4 Mortality Trends for Adults with Developmental Disability: A Cross-Sectional Study Utilizing  
5 U.S. Mortality Data from 2012 to 2016  
6  
7

8 Public health and preventive care efforts aimed at reducing premature mortality rely on  
9  
10 population mortality data from death certificates.<sup>1,2</sup> Thus, it is imperative that death certificates  
11 accurately identify a valid and informative underlying cause of death (UCOD), the disease or  
12 injury that initiated the causal sequence of events leading to death. Beyond general concerns with  
13 the overall accuracy of death certificate data,<sup>3-5</sup> researchers express specific concern regarding  
14 the frequency in which the UCOD identifies a cause that is not valid or informative for public  
15 health and preventive care efforts aimed at reducing premature mortality.<sup>2,6,7</sup> One such cause of  
16 concern occurs when decedents with developmental disability have their disability coded as their  
17 UCOD.<sup>8-14</sup>  
18  
19  
20  
21  
22  
23  
24  
25  
26  
27

28 Developmental disabilities comprise a diverse array of conditions that originate at birth or  
29 during the early developmental part of life - intellectual disability, cerebral palsy, Down  
30 syndrome, autism, as well as other chromosomal abnormalities.<sup>15</sup> These disabilities directly  
31 impact daily living via impairments in the areas of mobility, language, learning, self-care, and  
32 independent living, and extend across a person's life course.<sup>15</sup> As they are lifelong conditions,  
33 there is increasing consensus that developmental disabilities *should not* be considered a valid  
34 UCOD, as doing so prohibits identification of the preventable medical cause of death, and is not  
35 advantageous to public health or preventive care efforts.<sup>2,8-16</sup> Instead, the goal in coding the  
36 UCOD on death certificates for persons with developmental disability should be to identify the  
37 specific, and often preventable, disease or injury other than disability that initiated the sequence  
38 of events leading to death.  
39  
40  
41  
42  
43  
44  
45  
46  
47  
48  
49  
50  
51  
52  
53  
54  
55  
56  
57  
58  
59  
60

1  
2  
3 Cerebral palsy offers insight to the limitations of coding a developmental disability as an  
4 UCOD. Cerebral palsy describes a group of various permanent non-progressive motor disorders  
5 which stem from an injury to or malfunction in the developing brain and vary in severity, cause,  
6 and presentation.<sup>17</sup> Besides the motor disorders that cause activity limitations, there can be  
7 associated conditions that accompany the diagnosis of cerebral palsy such as epilepsy or  
8 problems with sensation, cognition, communication, and behavior. People with cerebral palsy  
9 also have risk factors for general health conditions shared with the general population, such as  
10 chronic heart disease.<sup>18</sup> Due to a higher prevalence of gastroesophageal reflux and/or dysphagia  
11 among adults with moderate to severe forms of cerebral palsy, there is increased risk among this  
12 population for aspiration on either saliva, food, or gastric contents leading to pneumonia or  
13 pneumonitis, and subsequent death.<sup>19,20</sup> In the event that an individual with cerebral palsy  
14 aspirates on food, develops pneumonia, and dies, it is not useful to identify the UCOD as  
15 cerebral palsy. Doing so conceals the fact that death was due to aspiration and subsequent  
16 development of pneumonia, and fails to differentiate this causal pathway from other causal  
17 pathways such as arteriosclerotic heart disease leading to acute myocardial infarction and death.  
18 As this example illustrates, coding a developmental disability as the UCOD is  
19 uninformative,<sup>2,21,22</sup> and, as Trollor and colleagues<sup>12</sup> contend, “obscures” actual mortality trends  
20 related to preventable conditions that need increased attention in public health or preventive care  
21 efforts.

22  
23  
24  
25  
26  
27  
28  
29  
30  
31  
32  
33  
34  
35  
36  
37  
38  
39  
40  
41  
42  
43  
44  
45  
46  
47  
48  
49  
50  
51  
52  
53  
54  
55  
56  
57  
58  
59  
60

Prior studies report the prevalence and obscuring effect of coding a developmental disability as the UCOD. Internationally, 16% of persons with developmental disability in general,<sup>12</sup> and between 34% and 56% of persons with cerebral palsy in particular,<sup>8,23</sup> had their disability coded as their UCOD. Among the U.S. population, 20% of decedents with an

1  
2  
3 intellectual disability,<sup>10</sup> and 21% of decedents with Down syndrome,<sup>24</sup> had their disability coded  
4 as their UCOD. Two studies, from Canada<sup>14</sup> and Australia,<sup>12</sup> that mention the obscuring effect of  
5 this practice on mortality trends report a substantial increase in deaths from respiratory disease  
6 after revising death certificates coded with a developmental disability as the UCOD. To date,  
7 researchers have not detailed the obscuring effect of coding a developmental disability as the  
8 UCOD on mortality trends for adults with developmental disability in the U.S. To determine the  
9 severity of this problem, we compare mortality trends for adult decedents with developmental  
10 disability using the originally reported and a revised UCOD from U.S. death certificate data.

## 11 **Methods**

12  
13  
14  
15  
16  
17  
18  
19  
20  
21  
22  
23  
24  
25  
26  
27  
28  
29  
30  
31  
32  
33  
34  
35  
36  
37  
38  
39  
40  
41  
42  
43  
44  
45  
46  
47  
48  
49  
50  
51  
52  
53  
54  
55  
56  
57  
58  
59  
60  
Death certificate data for this study are from the National Vital Statistics System 2012-  
2016 U.S. Multiple Cause-of-Death Mortality files. As mortality coding in the U.S. converted to  
ICD-10 in 2009,<sup>25</sup> this study included the death certificates for adults aged 18-103 at the time of  
death that recorded an ICD-10 code for a developmental disability as the UCOD, or as a multiple  
cause of death (other co-morbidities present at time of death) - intellectual disability (F70-79),  
cerebral palsy (G80), Down syndrome (Q90), and other developmental disabilities (F80-89, Q91-  
99). This resulted in a sample of 33,154 death certificates over the 5-year period.

If the UCOD listed on the death certificate was not coded as a developmental disability, it  
was accepted as valid and retained for analysis. In the event that the developmental disability  
was identified as the UCOD, it was revised by the study team utilizing a sequential UCOD  
revision process.<sup>8,12</sup> We chose to identify a singular UCOD code to construct a straightforward  
methodology, recognizing some recent studies contend that multiple morbidity data could be  
helpful, especially in understanding complex conditions with co-morbidities, as in dementia and  
Alzheimer disease.<sup>26,27</sup> In the instances when the UCOD was revised, a valid UCOD was located



1  
2  
3 by working sequentially from the last line to the first line of Part I of the death certificate,  
4 moving from the first to the last listed code per line. ICD-10 codes that the CDC states are not to  
5 be used as the UCOD were not considered valid options for the revised UCOD.<sup>28</sup> In addition,  
6 ICD-10 Chapter 18 R-codes were only utilized if no other valid UCOD was listed in Part I of the  
7 death certificate.<sup>2</sup>  
8  
9  
10  
11  
12  
13

14 All analysis was conducted using STATA Version 15.0 (College Station, TX). Results  
15 are presented by developmental disability group due to disparate cause of death trends –  
16 intellectual disability, cerebral palsy, Down syndrome, other developmental disability, and  
17 multiple developmental disabilities. For each group, we report: UCOD percentages by ICD-10  
18 chapter code for all death certificates prior to and after revisions; changes in the cause of death  
19 rank order; and percentage point differences between original and revised data. We also detail  
20 the leading specific underlying causes of death within ICD-10 chapters reflecting the most  
21 drastic changes.  
22  
23  
24  
25  
26  
27  
28  
29  
30  
31

## 32 **Results**

33 Full comparative results of the original and revised UCOD by ICD-10 Chapter code are  
34 presented for each disability group in Tables 1-5. Though detailed in the text, information on  
35 specific underlying causes of death per ICD-10 Chapter are not included in the tables. We  
36 compared results from aggregated data to results from each specific year prior and subsequent to  
37 revisions. The only dissimilarity was a slight increase in the percentage of decedents with Down  
38 syndrome who had Q90 coded as their UCOD beginning in 2014.  
39  
40  
41  
42  
43  
44  
45  
46  
47  
48

49 There were 7,901 decedents with intellectual disability, 11,895 decedents with cerebral  
50 palsy, 9,114 decedents with Down syndrome, 2,479 decedents with other developmental  
51 disabilities, and 1,765 decedents with multiple developmental disabilities. The UCOD was coded  
52  
53  
54  
55  
56  
57

1  
2  
3 as a developmental disability, and thus was revised, on the death certificates of 48.52% of all  
4  
5 decedents with a developmental disability, but varied by disability type - 25.88% of decedents  
6  
7 with intellectual disability, 59.53% of decedents with cerebral palsy, 58.99% of decedents with  
8  
9 Down syndrome, 26.42% of decedents with other developmental disabilities, and 52.69% of  
10  
11 decedents with multiple developmental disabilities.  
12  
13

14  
15 As expected, after revising the death certificates, there was a steep decline in the  
16  
17 percentage and rank order of decedents in each disability group with an UCOD in the ICD-10  
18  
19 chapter inclusive of their disability. Due to these revisions, the percentages increased for all other  
20  
21 ICD-10 chapters for all disability groups. We detail the most remarkable changes.  
22  
23

24  
25 Across groups, the percentage of deaths caused by diseases of the respiratory system,  
26  
27 ICD-10 Chapter X, rose dramatically after the revision: from 15.37% to 23.67% for decedents  
28  
29 with intellectual disability; from 8.95% to 29% for decedents with cerebral palsy; from 8.56% to  
30  
31 27% for decedents with Down syndrome; from 8.67% to 16.3% for decedents with other  
32  
33 developmental disabilities; and from 12.01% to 29.24% for decedents with multiple  
34  
35 developmental disabilities. As a result, respiratory deaths rose from the 3<sup>rd</sup> to the 1<sup>st</sup> leading  
36  
37 cause of death for decedents with intellectual disability, cerebral palsy, Down syndrome, and  
38  
39 multiple developmental disabilities; and from the 5<sup>th</sup> to the 2<sup>nd</sup> leading cause of death for  
40  
41 decedents with other developmental disabilities such as autism.  
42  
43

44  
45 For all disability groups, the most prevalent underlying causes of death identified among  
46  
47 diseases of the respiratory system were J69 Pneumonitis due to inhalation of food/vomit and  
48  
49 J18.9 Pneumonia, unspecified organism. The percentage of deaths from pneumonitis due to  
50  
51 inhalation of food/vomit increased from: 5.73% to 9.57% among decedents with intellectual  
52  
53 disability; 3.14% to 10.08% among decedents with cerebral palsy; 5.43% to 9.84% among  
54  
55  
56  
57

1  
2  
3 decedents with Down syndrome; 3.03% to 5.77% among decedents with other developmental  
4 disabilities; and 5.72% to 12.18% among decedents with multiple developmental disabilities.  
5  
6 The percentage of deaths from pneumonia, unspecified organism rose from: 4.38% to 7.1%  
7  
8 among decedents with intellectual disability; 2.3% to 8.53% among decedents with cerebral  
9  
10 palsy; 0.07% to 10.19% among decedents with Down syndrome; 2.02% to 4.4% among  
11  
12 decedents with other developmental disabilities; and 2.21% to 8.67% among decedents with  
13  
14 multiple developmental disabilities.  
15  
16  
17  
18

19 To varying degrees, deaths from external causes of mortality, ICD-10 Chapter XX,  
20  
21 increased in percent and rank order for four of the disability groups: from 2.67% to 7.53% (rank  
22  
23 order increase from 9 to 3) for decedents with intellectual disability; from 1.65% to 5.89% (rank  
24  
25 order increase from 9 to 5) for decedents with cerebral palsy; from 7.34% to 8.75% (rank order  
26  
27 increase from 7 to 4) for decedents with other developmental disabilities; from 1.76% to 6.06%  
28  
29 (rank order increase from 10 to 6) for decedents with multiple developmental disabilities. While  
30  
31 the percentage of deaths from external causes of mortality rose from 2.79% to 3.86% for  
32  
33 decedents with Down syndrome, the rank order dropped one position from 5 to 6.  
34  
35  
36  
37

38 For each disability group, the most prevalent underlying causes of death in the external  
39  
40 causes chapter were W78-80, Accidental inhalation and ingestion of food or other objects  
41  
42 causing obstruction of the respiratory tract. The percentage of deaths from accidental choking  
43  
44 increased: from 0.1% to 4.80% among decedents with intellectual disability; from 0.02% to  
45  
46 3.76% among decedents with cerebral palsy; from 1.32% to 2.28% among decedents with Down  
47  
48 syndrome; from 3.19% to 4.48% among decedents with other developmental disabilities; and  
49  
50 from 0.17% to 4.09% among decedents with multiple developmental disabilities.  
51  
52  
53  
54  
55  
56  
57  
58  
59  
60

1  
2  
3 One other remarkable finding among all disability groups regarded the percentage of  
4 decedents who had either an unknown or an imprecise UCOD. Unknown causes of death were  
5 recorded when no other ICD-10 code was listed in Part I of the death certificate other than  
6 disability. Imprecise underlying causes occurred when no other ICD-10 code was listed in Part I  
7 of the death certificate other than the developmental disability and/or a single or multiple R code  
8 from Chapter XVIII. As a result, the UCOD was either unknown or imprecise for: 4.96% of  
9 decedents with intellectual disability; 17.17% of decedents with cerebral palsy; 8.88% of  
10 decedents with Down syndrome; 8.51% of decedents with other developmental disabilities; and  
11 11.51% of decedents with multiple developmental disabilities. This means that even after  
12 revision, the death certificate provided little to no indication of the disease or injury that initiated  
13 the sequence of events leading to the death of these individuals.  
14  
15  
16  
17  
18  
19  
20  
21  
22  
23  
24  
25  
26  
27

28 Particular to decedents with Down syndrome, deaths from diseases of the nervous  
29 system, ICD-10 Chapter VI, rose from 5.31% to 13.18% (rank order increase from 4 to 3). The  
30 most prevalent UCOD for decedents with Down syndrome in this chapter, G30.9 Alzheimer  
31 disease, unspecified, increased from 3.27% to 9.5%. In addition, contrary to trends among the  
32 other disability groups, deaths from mental, behavioral, and neurodevelopmental disorders, ICD-  
33 10 Chapter V, rose from 1.73% to 11.82% (rank order increase from 10 to 4). The most prevalent  
34 cause of death in this chapter, F03 Unspecified dementia, increased from 1.62% to 11.4%.  
35  
36  
37  
38  
39  
40  
41  
42  
43

## 44 **Discussion**

45  
46 In 2012-2016 U.S. death certificate data, the coding of a developmental disability as the  
47 UCOD is widespread, but varied among specific disability groups. Results from this study  
48 expose that the practice of coding a developmental disability as the UCOD on a death certificate  
49 obscures the higher prevalence of choking related deaths (coded as either pneumonitis due to  
50  
51  
52  
53  
54  
55  
56  
57  
58  
59  
60

1  
2  
3 inhalation of food/vomit, or accidental choking) among all developmental disability groups, and  
4  
5 obscures dementia and Alzheimer disease related deaths among decedents with Down syndrome.  
6

7  
8 In instances when death certificates that code a developmental disability as the UCOD  
9  
10 are not revised, population mortality trends for persons with various types of developmental  
11  
12 disability are likely to be inaccurate and may, therefore, misinform public health and preventive  
13  
14 care efforts aimed at preventing premature mortality. The primary strength of this study is that  
15  
16 results demonstrate that the prominence of choking related deaths as a mortality risk among  
17  
18 persons with developmental disability was severely underestimated prior to revision. As revision  
19  
20 of the UCOD revealed, similar to the older adult population,<sup>29-31</sup> careful attention is needed to  
21  
22 attend to the heightened risk of preventable choking related deaths among persons with  
23  
24 developmental disability.<sup>15,32,33</sup> Thus, it is of the utmost importance that public health and  
25  
26 preventive care efforts focus on management of the swallowing function among this population.  
27  
28 Physicians conducting routine exams should be screening for swallowing disorders,  
29  
30 abnormalities in the cough and gag reflex, as well as respiratory distress.<sup>15,33</sup> Mortality data  
31  
32 based upon original death certificates, often coding developmental disability as UCOD, fail to  
33  
34 reveal this important mortality trend.  
35  
36  
37  
38  
39

40  
41 Unfortunately, current guidelines for completing death certificates in the U.S. permit  
42  
43 identifying a developmental disability as the UCOD in at least two known instances. ICD-10  
44  
45 codes for intellectual disability (F70-79) are permitted as UCOD in instances that the actual  
46  
47 UCOD is not known.<sup>34</sup> In addition, the CDC suggests coding Down syndrome as the UCOD in  
48  
49 the event the death certificate indicates unspecified dementia or Alzheimer disease. Continued  
50  
51 permission of the practice of coding a developmental disability as the UCOD demands both  
52  
53 short-term and long-term redress. As this study highlights, analysis of mortality trends for adults  
54  
55  
56  
57  
58  
59  
60

1  
2  
3 with developmental disability must recognize the obscuring effect of coding a developmental  
4 disability as the UCOD and take the necessary steps to revise the UCOD on these death  
5 certificates prior to reporting findings. The sequential UCOD revision process utilized in this  
6 study reduces obfuscation of mortality trends among populations with developmental disabilities  
7 in the short-term.  
8  
9  
10  
11  
12  
13

14 While revising death certificates for adults with developmental disability is a necessary  
15 short-term solution, the primary limitations of this study indicate that retrospective revision is not  
16 a sufficient long-term solution. The first limitation regards accuracy of revised death certificates.  
17 Despite best efforts and available data, it is not possible to verify the accuracy of the revised  
18 UCOD without access to the medical records of the decedent and the medical personnel that  
19 completed the death certificate. Although the only remedy present at the time, the method of  
20 retrospectively revising the UCOD should not be viewed as a sustainable long-term strategy for  
21 surveilling mortality trends among this population. Instead, focus should be on ensuring that at  
22 the time of death, the individual completing the death certificate accurately identifies the disease  
23 process or injury, other than developmental disability, that initiated the chain of events leading to  
24 death. In addition, it is unlikely that the death certificates of all decedents with a developmental  
25 disability included an ICD-10 code for developmental disability. Based on inconsistencies  
26 regarding the proper location to code developmental disability on death certificates we observed  
27 in this study, it is obvious that there is confusion regarding where to record a developmental  
28 disability on the death certificate. This confusion may result in persons certifying the death  
29 certificate of decedents with a known development disability not recording the developmental  
30 disability on the death certificate at all. Thus, the results from this study only describe mortality  
31  
32  
33  
34  
35  
36  
37  
38  
39  
40  
41  
42  
43  
44  
45  
46  
47  
48  
49  
50  
51  
52  
53  
54  
55  
56  
57  
58  
59  
60

1  
2  
3 trends for decedents with developmental disability who had their disability recorded on their  
4 death certificate.  
5  
6

7  
8 In order to fully address these limitations, it is necessary to move beyond retrospective  
9 remedies, and formally change instructions for coding a developmental disability on the death  
10 certificate. Part II of the death certificate is intended for the recording of co-morbidities that were  
11 present at the time of death, but were not part of the sequence of events leading to death. To  
12 ensure that developmental disabilities are recorded on the death certificate, but not identified as  
13 the UCOD, instructions for completing death certificates should specify that developmental  
14 disabilities should not be recorded in Part I or permitted as the UCOD. Instead, developmental  
15 disabilities should be recorded in Part II of the death certificate.<sup>10,11,13</sup> Further evidence from this  
16 study supports this recommendation. Among the death certificates that recorded a developmental  
17 disability in Part I (with or without also recording a developmental disability in Part II), 82%  
18 coded developmental disability as the UCOD. In contrast, among the death certificates that  
19 recorded a developmental disability only in Part II, 19% coded developmental disability as the  
20 UCOD. This proposed change would preserve the ability to surveil mortality trends for this  
21 population by ensuring the recording of the developmental disability on the death certificate  
22 while minimizing the possibility a developmental disability is coded as the UCOD. Changing the  
23 instructions for coding developmental disability would also increase the accuracy of mortality  
24 data for adults with developmental disability by deterring the coding of a developmental  
25 disability as an UCOD. As a result, the death certificates of this population would more  
26 accurately represent actual mortality trends, allowing for better-informed public health and  
27 preventive care efforts to reduce premature mortality for this population.  
28  
29  
30  
31  
32  
33  
34  
35  
36  
37  
38  
39  
40  
41  
42  
43  
44  
45  
46  
47  
48  
49  
50  
51  
52  
53  
54  
55  
56  
57  
58  
59  
60

## Acknowledgements

Author Contributions: Landes had full access to all of the data in the study and takes responsibility for the integrity of the data and the accuracy of the data analysis.

Concept and design: Landes, Stevens, Turk.

Acquisition of data: Landes

Analysis of data: Landes, Stevens.

Interpretation of data: Landes, Stevens, Turk.

Drafting of the manuscript: Landes, Stevens.

Critical revision of the manuscript for important intellectual content: Landes, Stevens, Turk.

Competing Interests: None.

Funding: No funding was received for this project.



## References

1. Jha P. Counting the dead is one of the world's best investments to reduce premature mortality. *Hypothesis*. 2012;10(1):e3.
2. Naghavi M, Makela S, Foreman K, O'Brien J, Pourmalek F, Lozano R. Algorithms for enhancing public health utility of national causes-of-death data. *Popul Health Metr*. 2010;8(1):9.
3. Messite J, Stellman SD. Accuracy of death certificate completion: The need for formalized physician training. *JAMA*. 1996;275(10):794-796.
4. Maudsley G, Williams EMI. 'Inaccuracy' in death certification – where are we now? *J Public Health (Oxf)*. 1996;18(1):59-66.
5. Kuller LH. The use of existing databases in morbidity and mortality studies. *Am J Public Health*. 1995;85(9):1198-1200.
6. Foreman KJ, Naghavi M, Ezzati M. Improving the usefulness of US mortality data: new methods for reclassification of underlying cause of death. *Popul Health Metr*. 2016;14:14.
7. Murray CJL, Lopez AD, Harvard School of Public Health, World Health Organization. *The global burden of disease: a comprehensive assessment of mortality and disability from diseases, injuries, and risk factors in 1990 and projected to 2020: summary*. Cambridge, MA: Harvard School of Public Health on behalf of the World Health Organization and World Bank; 1996.
8. Duruflé-Tapin A, Colin A, Nicolas B, Lebreton C, Dauvergne F, Gallien P. Analysis of the medical causes of death in cerebral palsy. *Ann Phys Rehabil Med*. 2014;57(1):24-37.
9. Goldman SE, Urbano RC, Hodapp RM. Determining the amount, timing and causes of mortality among infants with Down syndrome. *J Intellect Disabil Res*. 2011;55(1):85-94.
10. Landes SD, Peek CW. Death by mental retardation? The influence of ambiguity on death certificate coding error for adults with intellectual disability. *J Intellect Disabil Res*. 2013;57(12):1183-1190.
11. Stirton FD, Heslop P. Medical Certificates of Cause of Death for people with intellectual disabilities: A systematic literature review. *J Appl Res Intellect Disabil*. 2018;0(0).
12. Trollor J, Srasuebku P, Xu H, Howlett S. Cause of death and potentially avoidable deaths in Australian adults with intellectual disability using retrospective linked data. *BMJ Open*. 2017;7(2).
13. Tyrer F, McGrother C. Cause-specific mortality and death certificate reporting in adults with moderate to profound intellectual disability. *J Intellect Disabil Res*. 2009;53(11):898-904.
14. Baird PA, Sadovnick AD. Underlying cause of death in Down syndrome: Accuracy of British Columbia death certificate data. *Can J Public Health*. 1990;81(November/December):456-461.
15. Rubin IL, Crocker AC. *Medical care for children & adults with developmental disabilities*. Baltimore, MD: Paul H. Brookes Publishing; 2006.
16. Hosking FJ, Carey IM, Shah SM, et al. Mortality Among Adults With Intellectual Disability in England: Comparisons With the General Population. *Am J Public Health*. 2016;106(8):1483-1490.
17. Rosenbaum PP, N., Leviton A, Goldstein M, et al. A report: the definition and classification of cerebral palsy April 2006. *Dev Med Child Neurol*. 2007;49(SUPPL.09):8-14.

18. Peterson MD, Ryan JM, Hurvitz EA, Mahmoudi E. Chronic conditions in adults with cerebral palsy. *JAMA*. 2015;314(21):2303-2305.
19. Fortuna RJ, Holub A, Turk MA, Meccarello J, Davidson PW. Health conditions, functional status and health care utilization in adults with cerebral palsy. *Fam Pract*. 2018.
20. Henderson CM, Rosasco M, Robinson LM, et al. Functional impairment severity is associated with health status among older persons with intellectual disability and cerebral palsy. *J Intellect Disabil Res*. 2009;53(11):887-897.
21. Shavelle RM, Strauss DJ, Pickett J. Causes of Death in Autism. *J Autism Dev Disord*. 2001;31(6):569-576.
22. Strauss D, Cable W, Shavelle R. Causes of excess mortality in cerebral palsy. *Dev Med Child Neurol*. 1999;41(9):580-585.
23. Maudsley G, Hutton JL, Pharoah POD. Cause of death in cerebral palsy: a descriptive study. *Arch Dis Child*. 1999;81(5):390.
24. Miodrag N, Silverberg SE, Urbano RC, Hodapp RM. Deaths Among Children, Adolescents, and Young Adults with Down Syndrome. *J Appl Res Intellect Disabil*. 2013;26(3):207-214.
25. Dimick C. Mortality coding marks 10 years of ICD-10. *J AHIMA*. 2009;80(7):30-33.
26. Browne J, Edwards DA, Rhodes KM, Brimicombe DJ, Payne RA. Association of comorbidity and health service usage among patients with dementia in the UK: a population-based study. *BMJ Open*. 2017;7(3).
27. Park J. Mortality from Alzheimer's disease in Canada: A multiple-cause-of-death analysis, 2004 to 2011. *Health Repts*. 2016;27(5):17-21.
28. National Center for Health Statistics. Part 2c. ICD-10 ACME decision tables for classifying underlying causes of death. Centers for Disease Control and Prevention. [https://www.cdc.gov/nchs/data/dvs/2c\\_2016.pdf](https://www.cdc.gov/nchs/data/dvs/2c_2016.pdf). Published 2016. Accessed June 11, 2018.
29. Berzlanovich AM, Fazeny-Dörner B, Waldhoer T, Fasching P, Keil W. Foreign body asphyxia. *Am J Prev Med*. 2005;28(1):65-69.
30. Kramarow E, Warner M, Chen L-H. Food-related choking deaths among the elderly. *Inj Prev*. 2014;20(3):200.
31. Wu W-S, Sung K-C, Cheng T-J, Lu T-H. Associations between chronic diseases and choking deaths among older adults in the USA: a cross-sectional study using multiple cause mortality data from 2009 to 2013. *BMJ Open*. 2015;5(11).
32. Prasher V, Janicki M, eds. *Physical health of adults with intellectual disability*. Malden, MA: Blackwell; 2002.
33. Marik PE. Aspiration Pneumonitis and Aspiration Pneumonia. *N Engl J Med*. 2001;344(9):665-671.
34. National Center for Health Statistics. Part 2a. Instructions for classifying the underlying causes of death: ICD-10. Centers for Disease Control and Prevention. [https://www.cdc.gov/nchs/nvss/instruction\\_manuals.htm](https://www.cdc.gov/nchs/nvss/instruction_manuals.htm). Published 2017. Accessed June 11, 2018.

Table 1: UCOD (UCOD) trends for decedents with intellectual disability, 2012-2016 U.S. Multiple Cause-of-Death Mortality files (N=7,901)

| ICD-10 Chapter |         |                                                                                                     | Rank order change | Original UCOD | Revised UCOD | Absolute Difference |
|----------------|---------|-----------------------------------------------------------------------------------------------------|-------------------|---------------|--------------|---------------------|
| X.             | J00-J99 | Diseases of the respiratory system                                                                  | 3 ↗ 1             | 15.37%        | 23.67%       | 8.30%               |
| IX.            | I00-I99 | Diseases of the circulatory system                                                                  | 2 → 2             | 17.18%        | 20.45%       | 3.27%               |
| XX.            | V00-Y99 | External causes of mortality                                                                        | 9 ↗ 3             | 2.67%         | 7.53%        | 4.86%               |
| VI.            | G00-G99 | Diseases of the nervous system                                                                      | 5 ↗ 4             | 6.81%         | 7.39%        | 0.58%               |
| II.            | C00-D49 | Neoplasms                                                                                           | 4 ↘ 5             | 7.00%         | 7.05%        | 0.05%               |
| IV.            | E00-E89 | Endocrine, nutritional and metabolic diseases                                                       | 6 → 6             | 5.94%         | 6.66%        | 0.72%               |
| V.             | F01-F99 | Mental, behavioral, and neurodevelopmental disorders*                                               | 1 ↘ 7             | 30.92%        | 5.72%        | -25.20%             |
| XI.            | K00-K95 | Diseases of the digestive system                                                                    | 7 ↘ 8             | 5.37%         | 5.71%        | 0.34%               |
| I.             | A00-B99 | Certain infectious and parasitic diseases                                                           | 8 ↘ 9             | 3.24%         | 3.82%        | 0.58%               |
| XVIII.         | R00-R99 | Symptoms, signs, and abnormal clinical and laboratory findings, not elsewhere classified            | 16 ↗ 10           | 0.00%         | 3.72%        | 3.72%               |
| XIV.           | N00-N99 | Diseases of the genitourinary system                                                                | 10 ↘ 11           | 2.53%         | 3.47%        | 0.94%               |
| XVII.          | Q00-Q99 | Congenital malformations, deformations, and chromosomal abnormalities                               | 11 ↘ 12           | 1.35%         | 1.57%        | 0.22%               |
| ---            | ---     | Unknown                                                                                             | 16 ↗ 13           | 0.00%         | 1.24%        | 1.24%               |
| XIII.          | M00-M99 | Diseases of the musculoskeletal system and connective tissue                                        | 12 ↘ 14           | 0.84%         | 0.92%        | 0.08%               |
| XII.           | L00-L99 | Diseases of the skin and subcutaneous tissue                                                        | 13 ↘ 15           | 0.32%         | 0.48%        | 0.16%               |
| III.           | D50-D89 | Diseases of the blood and blood-forming organs and certain disorders involving the immune mechanism | 13 ↘ 16           | 0.32%         | 0.42%        | 0.10%               |
| XVI.           | P00-P96 | Certain conditions originating in the perinatal period                                              | 14 ↘ 17           | 0.11%         | 0.11%        | 0.00%               |
| VIII.          | H60-H95 | Diseases of the ear and mastoid process                                                             | 15 ↘ 18           | 0.03%         | 0.04%        | 0.01%               |
| VII.           | H00-H59 | Diseases of the eye and adnexa                                                                      | 15 ↘ 19           | 0.03%         | 0.03%        | 0.00%               |

\*Indicates ICD-10 Chapter inclusive of intellectual disability.

Table 2: UCOD (UCOD) trends for decedents with cerebral palsy, 2012-2016 U.S. Multiple Cause-of-Death Mortality files (N=11,895)

| ICD-10 Chapter |         |                                                                                                     | Rank order change | Original UCOD | Revised UCOD | Absolute Difference |
|----------------|---------|-----------------------------------------------------------------------------------------------------|-------------------|---------------|--------------|---------------------|
| X.             | J00-J99 | Diseases of the respiratory system                                                                  | 3 ↗ 1             | 8.95%         | 29.00%       | 20.05%              |
| IX.            | I00-I99 | Diseases of the circulatory system                                                                  | 2 → 2             | 9.42%         | 15.06%       | 5.64%               |
| ---            | ---     | Unknown                                                                                             | 17 ↗ 3            | 0.00%         | 11.71%       | 11.71%              |
| VI.            | G00-G99 | Diseases of the nervous system*                                                                     | 1 ↘ 4             | 62.05%        | 6.53%        | -55.52%             |
| XX.            | V00-Y99 | External causes of mortality                                                                        | 9 ↗ 5             | 1.65%         | 5.89%        | 4.24%               |
| XVIII.         | R00-R99 | Symptoms, signs, and abnormal clinical and laboratory findings, not elsewhere classified            | 17 ↗ 6            | 0.00%         | 5.46%        | 5.46%               |
| XI.            | K00-K95 | Diseases of the digestive system                                                                    | 5 ↘ 7             | 3.83%         | 5.15%        | 1.32%               |
| II.            | C00-D49 | Neoplasms                                                                                           | 4 ↘ 8             | 4.62%         | 4.72%        | 0.10%               |
| I.             | A00-B99 | Certain infectious and parasitic diseases                                                           | 6 ↘ 9             | 2.69%         | 3.99%        | 1.30%               |
| XIV.           | N00-N99 | Diseases of the genitourinary system                                                                | 11 ↗ 10           | 0.81%         | 3.40%        | 2.59%               |
| IV.            | E00-E89 | Endocrine, nutritional and metabolic diseases                                                       | 7 ↘ 11            | 2.02%         | 3.31%        | 1.29%               |
| XVII.          | Q00-Q99 | Congenital malformations, deformations, and chromosomal abnormalities                               | 8 ↘ 12            | 1.65%         | 1.79%        | 0.14%               |
| V.             | F01-F99 | Mental, behavioral and neurodevelopmental disorders                                                 | 10 ↘ 13           | 1.08%         | 1.43%        | 0.35%               |
| XIII.          | M00-M99 | Diseases of the musculoskeletal system and connective tissue                                        | 12 ↘ 14           | 0.55%         | 1.08%        | 0.53%               |
| XII.           | L00-L99 | Diseases of the skin and subcutaneous tissue                                                        | 15 → 15           | 0.14%         | 0.58%        | 0.44%               |
| III.           | D50-D89 | Diseases of the blood and blood-forming organs and certain disorders involving the immune mechanism | 14 ↘ 16           | 0.23%         | 0.43%        | 0.20%               |
| XVI.           | P00-P96 | Certain conditions originating in the perinatal period                                              | 13 ↘ 16           | 0.31%         | 0.43%        | 0.12%               |
| VIII.          | H60-H95 | Diseases of the ear and mastoid process                                                             | 16 ↘ 17           | 0.01%         | 0.02%        | 0.01%               |
| VII.           | H00-H59 | Diseases of the eye and adnexa                                                                      | 17 ↘ 18           | 0.00%         | 0.01%        | 0.01%               |

\*Indicates ICD-10 Chapter inclusive of cerebral palsy.

1  
2  
3  
4  
5  
6  
7  
8  
9  
10  
11  
12  
13  
14  
15  
16  
17  
18  
19  
20  
21  
22  
23  
24  
25  
26  
27  
28  
29  
30  
31  
32  
33  
34  
35  
36  
37  
38  
39  
40  
41  
42  
43  
44  
45  
46  
47

Table 3: UCOD (UCOD) trends for decedents with Down syndrome, 2012-2016 U.S. Multiple Cause-of-Death Mortality files (N=9,114)

| ICD-10 Chapter |         |                                                                                                     | Rank order change | Original UCOD | Revised UCOD | Absolute Difference |
|----------------|---------|-----------------------------------------------------------------------------------------------------|-------------------|---------------|--------------|---------------------|
| X.             | J00-J99 | Diseases of the respiratory system                                                                  | 3 ↗ 1             | 8.56%         | 27.00%       | 18.44%              |
| IX.            | I00-I99 | Diseases of the circulatory system                                                                  | 2 → 2             | 10.96%        | 17.38%       | 6.42%               |
| VI.            | G00-G99 | Diseases of the nervous system                                                                      | 4 ↗ 3             | 5.31%         | 13.18%       | 7.87%               |
| V.             | F01-F99 | Mental, behavioral, and neurodevelopmental disorders                                                | 10 ↗ 4            | 1.73%         | 11.82%       | 10.09%              |
| ---            | ---     | Unknown                                                                                             | 16 ↗ 5            | 0.00%         | 5.65%        | 5.65%               |
| XX.            | V00-Y99 | External causes of mortality                                                                        | 5 ↘ 6             | 2.79%         | 3.86%        | 1.07%               |
| IV.            | E00-E89 | Endocrine, nutritional and metabolic diseases                                                       | 7 → 7             | 2.15%         | 3.84%        | 1.69%               |
| XVIII.         | R00-R99 | Symptoms, signs and abnormal clinical and laboratory findings, not elsewhere classified             | 15 ↗ 8            | 0.01%         | 3.23%        | 3.22%               |
| I.             | A00-B99 | Certain infectious and parasitic diseases                                                           | 6 ↘ 9             | 2.32%         | 3.12%        | 0.80%               |
| XIV.           | N00-N99 | Diseases of the genitourinary system                                                                | 11 ↗ 10           | 1.29%         | 2.56%        | 1.27%               |
| XVII.          | Q00-Q99 | Congenital malformations, deformations, and chromosomal abnormalities*                              | 1 ↘ 11            | 60.27%        | 2.51%        | -57.76%             |
| XI.            | K00-K95 | Diseases of the digestive system                                                                    | 9 ↘ 12            | 1.78%         | 2.24%        | 0.46%               |
| II.            | C00-D49 | Neoplasms                                                                                           | 8 ↘ 13            | 2.10%         | 2.12%        | 0.02%               |
| XIII.          | M00-M99 | Diseases of the musculoskeletal system and connective tissue                                        | 12 ↘ 14           | 0.35%         | 0.52%        | 0.17%               |
| III.           | D50-D89 | Diseases of the blood and blood-forming organs and certain disorders involving the immune mechanism | 13 ↘ 15           | 0.26%         | 0.49%        | 0.23%               |
| XII.           | L00-L99 | Diseases of the skin and subcutaneous tissue                                                        | 14 ↘ 16           | 0.11%         | 0.46%        | 0.35%               |
| XVI.           | P00-P96 | Certain conditions originating in the perinatal period                                              | 16 ↘ 17           | 0.00%         | 0.02%        | 0.02%               |
| VIII.          | H60-H95 | Diseases of the ear and mastoid process                                                             | 15 ↘ 18           | 0.01%         | 0.01%        | 0.00%               |

\*Indicates ICD-10 Chapter inclusive of Down syndrome.

Table 4: UCOD (UCOD) trends for decedents with other developmental disabilities, 2012-2016 U.S. Multiple Cause-of-Death Mortality files (N=2,479)

| ICD-10 Chapter |         |                                                                                                     | Rank order change | Original UCOD | Revised UCOD | Absolute Difference |
|----------------|---------|-----------------------------------------------------------------------------------------------------|-------------------|---------------|--------------|---------------------|
| IX.            | I00-I99 | Diseases of the circulatory system                                                                  | 2 ↗ 1             | 15.97%        | 19.48%       | 3.51%               |
| X.             | J00-J99 | Diseases of the respiratory system                                                                  | 5 ↗ 2             | 8.67%         | 16.30%       | 7.63%               |
| II.            | C00-D49 | Neoplasms                                                                                           | 4 ↗ 3             | 11.29%        | 11.42%       | 0.13%               |
| XX.            | V00-Y99 | External causes of mortality                                                                        | 7 ↗ 4             | 7.34%         | 8.75%        | 1.41%               |
| VI.            | G00-G99 | Diseases of the nervous system                                                                      | 6 ↗ 5             | 7.42%         | 8.39%        | 0.97%               |
| IV.            | E00-E89 | Endocrine, nutritional and metabolic diseases                                                       | 8 ↗ 6             | 5.77%         | 6.53%        | 0.76%               |
| XI.            | K00-K95 | Diseases of the digestive system                                                                    | 9 ↗ 7             | 5.16%         | 5.81%        | 0.65%               |
| ---            | ---     | Unknown                                                                                             | 17 ↗ 8            | 0.00%         | 4.88%        | 4.88%               |
| V.             | F01-F99 | Mental, behavioral, and neurodevelopmental disorders*                                               | 1 ↘ 9             | 17.39%        | 3.87%        | -13.52%             |
| XVIII.         | R00-R99 | Symptoms, signs, and abnormal clinical and laboratory findings, not elsewhere classified            | 15 ↗ 10           | 0.12%         | 3.63%        | 3.51%               |
| I.             | A00-B99 | Certain infectious and parasitic diseases                                                           | 10 ↘ 11           | 2.70%         | 3.03%        | 0.33%               |
| XVII.          | Q00-Q99 | Congenital malformations, deformations, and chromosomal abnormalities*                              | 3 ↘ 12            | 14.44%        | 2.99%        | -11.45%             |
| XIV.           | N00-N99 | Diseases of the genitourinary system                                                                | 11 ↘ 13           | 1.69%         | 2.38%        | 0.69%               |
| XIII.          | M00-M99 | Diseases of the musculoskeletal system and connective tissue                                        | 12 ↘ 14           | 0.93%         | 1.17%        | 0.24%               |
| III.           | D50-D89 | Diseases of the blood and blood-forming organs and certain disorders involving the immune mechanism | 13 ↘ 15           | 0.69%         | 0.85%        | 0.16%               |
| XII.           | L00-L99 | Diseases of the skin and subcutaneous tissue                                                        | 14 ↘ 16           | 0.24%         | 0.36%        | 0.12%               |
| XVI.           | P00-P96 | Certain conditions originating in the perinatal period                                              | 16 ↘ 17           | 0.08%         | 0.08%        | 0.00%               |
| XV.            | O00-O9A | Pregnancy, childbirth and the puerperium                                                            | 16 ↘ 17           | 0.08%         | 0.08%        | 0.00%               |

\*Indicates ICD-10 Chapter inclusive of other developmental disabilities.

1  
2  
3  
4  
5  
6  
7  
8  
9  
10  
11  
12  
13  
14  
15  
16  
17  
18  
19  
20  
21  
22  
23  
24  
25  
26  
27  
28  
29  
30  
31  
32  
33  
34  
35  
36  
37  
38  
39  
40  
41  
42  
43  
44  
45  
46  
47

Table 5: UCOD (UCOD) trends for decedents with multiple developmental disabilities, 2012-2016 U.S. Multiple Cause-of-Death Mortality files (N=1,765)

| ICD-10 Chapter |         |                                                                                                     | Rank order change | Original UCOD | Revised UCOD | Absolute Difference |
|----------------|---------|-----------------------------------------------------------------------------------------------------|-------------------|---------------|--------------|---------------------|
| X.             | J00-J99 | Diseases of the respiratory system                                                                  | 3 ↗ 1             | 12.01%        | 29.24%       | 17.23%              |
| IX.            | I00-I99 | Diseases of the circulatory system                                                                  | 5 ↗ 2             | 9.18%         | 16.03%       | 6.85%               |
| VI.            | G00-G99 | Diseases of the nervous system*                                                                     | 1 ↘ 3             | 32.24%        | 7.42%        | -24.82%             |
| XI.            | K00-K95 | Diseases of the digestive system                                                                    | 6 ↗ 4             | 5.89%         | 6.80%        | 0.91%               |
| XVIII.         | R00-R99 | Symptoms, signs, and abnormal clinical and laboratory findings, not elsewhere classified            | 15 ↗ 5            | 0.00%         | 6.35%        | 6.35%               |
| XX.            | V00-Y99 | External causes of mortality                                                                        | 10 ↗ 6            | 1.76%         | 6.06%        | 4.30%               |
| ---            | ---     | Unknown                                                                                             | 15 ↗ 7            | 0.00%         | 5.16%        | 5.16%               |
| I.             | A00-B99 | Certain infectious and parasitic diseases                                                           | 8 → 8             | 3.34%         | 4.42%        | 1.08%               |
| II.            | C00-D49 | Neoplasms                                                                                           | 7 ↘ 9             | 4.25%         | 4.31%        | 0.06%               |
| IV.            | E00-E89 | Endocrine, nutritional and metabolic diseases                                                       | 9 ↘ 10            | 1.98%         | 3.63%        | 1.65%               |
| XIV.           | N00-N99 | Diseases of the genitourinary system                                                                | 11 → 11           | 1.19%         | 3.06%        | 1.87%               |
| V.             | F01-F99 | Mental, behavioral, and neurodevelopmental disorders*                                               | 4 ↘ 12            | 11.22%        | 2.89%        | -8.33%              |
| XVII.          | Q00-Q99 | Congenital malformations, deformations, and chromosomal abnormalities*                              | 2 ↘ 13            | 15.81%        | 2.49%        | -13.32%             |
| XIII.          | M00-M99 | Diseases of the musculoskeletal system and connective tissue                                        | 12 ↘ 14           | 0.74%         | 1.25%        | 0.51%               |
| XII.           | L00-L99 | Diseases of the skin and subcutaneous tissue                                                        | 15 → 15           | 0.00%         | 0.45%        | 0.45%               |
| III.           | D50-D89 | Diseases of the blood and blood-forming organs and certain disorders involving the immune mechanism | 13 ↘ 16           | 0.28%         | 0.34%        | 0.06%               |
| XVI.           | P00-P96 | Certain conditions originating in the perinatal period                                              | 14 ↘ 17           | 0.11%         | 0.11%        | 0.00%               |

\*Indicates ICD-10 Chapter inclusive of multiple developmental disabilities.

**STROBE 2007 (v4) Statement—Checklist of items that should be included in reports of *cross-sectional studies***

| Section/Topic                | Item # | Recommendation                                                                                                                                                                       | Reported on page # |
|------------------------------|--------|--------------------------------------------------------------------------------------------------------------------------------------------------------------------------------------|--------------------|
| Title and abstract           | 1      | (a) Indicate the study's design with a commonly used term in the title or the abstract                                                                                               | 1                  |
|                              |        | (b) Provide in the abstract an informative and balanced summary of what was done and what was found                                                                                  | 2                  |
| <b>Introduction</b>          |        |                                                                                                                                                                                      |                    |
| Background/rationale         | 2      | Explain the scientific background and rationale for the investigation being reported                                                                                                 | 4-6                |
| Objectives                   | 3      | State specific objectives, including any prespecified hypotheses                                                                                                                     | 6                  |
| <b>Methods</b>               |        |                                                                                                                                                                                      |                    |
| Study design                 | 4      | Present key elements of study design early in the paper                                                                                                                              | 6-7                |
| Setting                      | 5      | Describe the setting, locations, and relevant dates, including periods of recruitment, exposure, follow-up, and data collection                                                      | 6                  |
| Participants                 | 6      | (a) Give the eligibility criteria, and the sources and methods of selection of participants                                                                                          | 6                  |
| Variables                    | 7      | Clearly define all outcomes, exposures, predictors, potential confounders, and effect modifiers. Give diagnostic criteria, if applicable                                             | 6-7                |
| Data sources/<br>measurement | 8*     | For each variable of interest, give sources of data and details of methods of assessment (measurement). Describe comparability of assessment methods if there is more than one group | 6                  |
| Bias                         | 9      | Describe any efforts to address potential sources of bias                                                                                                                            | 6                  |
| Study size                   | 10     | Explain how the study size was arrived at                                                                                                                                            | 6                  |
| Quantitative variables       | 11     | Explain how quantitative variables were handled in the analyses. If applicable, describe which groupings were chosen and why                                                         | 6                  |
| Statistical methods          | 12     | (a) Describe all statistical methods, including those used to control for confounding                                                                                                | 6-7                |
|                              |        | (b) Describe any methods used to examine subgroups and interactions                                                                                                                  | 6-7                |
|                              |        | (c) Explain how missing data were addressed                                                                                                                                          | NA                 |
|                              |        | (d) If applicable, describe analytical methods taking account of sampling strategy                                                                                                   | NA                 |
|                              |        | (e) Describe any sensitivity analyses                                                                                                                                                | NA                 |
| <b>Results</b>               |        |                                                                                                                                                                                      |                    |



|                          |     |                                                                                                                                                                                                              |       |
|--------------------------|-----|--------------------------------------------------------------------------------------------------------------------------------------------------------------------------------------------------------------|-------|
| Participants             | 13* | (a) Report numbers of individuals at each stage of study—eg numbers potentially eligible, examined for eligibility, confirmed eligible, included in the study, completing follow-up, and analysed            | 7-8   |
|                          |     | (b) Give reasons for non-participation at each stage                                                                                                                                                         | NA    |
|                          |     | (c) Consider use of a flow diagram                                                                                                                                                                           | NA    |
| Descriptive data         | 14* | (a) Give characteristics of study participants (eg demographic, clinical, social) and information on exposures and potential confounders                                                                     | 7-8   |
|                          |     | (b) Indicate number of participants with missing data for each variable of interest                                                                                                                          | NA    |
| Outcome data             | 15* | Report numbers of outcome events or summary measures                                                                                                                                                         | 7-8   |
| Main results             | 16  | (a) Give unadjusted estimates and, if applicable, confounder-adjusted estimates and their precision (eg, 95% confidence interval). Make clear which confounders were adjusted for and why they were included | 7-10  |
|                          |     | (b) Report category boundaries when continuous variables were categorized                                                                                                                                    | NA    |
|                          |     | (c) If relevant, consider translating estimates of relative risk into absolute risk for a meaningful time period                                                                                             | NA    |
| Other analyses           | 17  | Report other analyses done—eg analyses of subgroups and interactions, and sensitivity analyses                                                                                                               | NA    |
| <b>Discussion</b>        |     |                                                                                                                                                                                                              |       |
| Key results              | 18  | Summarise key results with reference to study objectives                                                                                                                                                     | 10    |
| Limitations              | 19  | Discuss limitations of the study, taking into account sources of potential bias or imprecision. Discuss both direction and magnitude of any potential bias                                                   | 11-12 |
| Interpretation           | 20  | Give a cautious overall interpretation of results considering objectives, limitations, multiplicity of analyses, results from similar studies, and other relevant evidence                                   | 11-12 |
| Generalisability         | 21  | Discuss the generalisability (external validity) of the study results                                                                                                                                        | 13    |
| <b>Other information</b> |     |                                                                                                                                                                                                              |       |
| Funding                  | 22  | Give the source of funding and the role of the funders for the present study and, if applicable, for the original study on which the present article is based                                                | 14    |

\*Give information separately for cases and controls in case-control studies and, if applicable, for exposed and unexposed groups in cohort and cross-sectional studies.

**Note:** An Explanation and Elaboration article discusses each checklist item and gives methodological background and published examples of transparent reporting. The STROBE checklist is best used in conjunction with this article (freely available on the Web sites of PLoS Medicine at <http://www.plosmedicine.org/>, Annals of Internal Medicine at <http://www.annals.org/>, and Epidemiology at <http://www.epidem.com/>). Information on the STROBE Initiative is available at [www.strobe-statement.org](http://www.strobe-statement.org).

# BMJ Open

## The Obscuring Effect of Coding Developmental Disability as the Underlying Cause of Death on Mortality Trends for Adults with Developmental Disability: A Cross-Sectional Study Utilizing U.S. Mortality Data from 2012 to 2016

|                                 |                                                                                                                                                                                                                                                                                            |
|---------------------------------|--------------------------------------------------------------------------------------------------------------------------------------------------------------------------------------------------------------------------------------------------------------------------------------------|
| Journal:                        | <i>BMJ Open</i>                                                                                                                                                                                                                                                                            |
| Manuscript ID                   | bmjopen-2018-026614.R1                                                                                                                                                                                                                                                                     |
| Article Type:                   | Research                                                                                                                                                                                                                                                                                   |
| Date Submitted by the Author:   | 10-Dec-2018                                                                                                                                                                                                                                                                                |
| Complete List of Authors:       | Landes, Scott; Syracuse University, Department of Sociology and Aging Studies Institute<br>Stevens, James; Syracuse University, Department of Sociology and Aging Studies Institute<br>Turk, Margaret; SUNY Upstate Medical University, Department of Physical Medicine and Rehabilitation |
| <b>Primary Subject Heading</b>: | Public health                                                                                                                                                                                                                                                                              |
| Secondary Subject Heading:      | Epidemiology                                                                                                                                                                                                                                                                               |
| Keywords:                       | Developmental disability, Underlying cause of death, Mortality trends                                                                                                                                                                                                                      |
|                                 |                                                                                                                                                                                                                                                                                            |

SCHOLARONE™  
Manuscripts

1  
2  
3  
4  
5  
6  
7  
8  
9  
10  
11  
12  
13  
14  
15  
16  
17 The Obscuring Effect of Coding Developmental Disability as the Underlying Cause of Death on  
18 Mortality Trends for Adults with Developmental Disability: A Cross-Sectional Study Utilizing  
19 U.S. Mortality Data from 2012 to 2016  
20  
21  
22  
23  
24  
25  
26  
27  
28  
29  
30

31  
32 Scott D. Landes, PhD<sup>1</sup>; J. Dalton Stevens, MA<sup>1</sup>; Margaret A. Turk, MD<sup>2</sup>  
33  
34  
35  
36  
37  
38  
39  
40

41 <sup>1</sup> Department of Sociology and Aging Studies Institute, Maxwell School of Citizenship and  
42 Public Affairs, Syracuse University

43 <sup>2</sup> Department of Physical Medicine and Rehabilitation, SUNY Upstate Medical Center  
44

45  
46 Corresponding Author: Scott D. Landes, PhD, Department of Sociology and Aging Studies  
47 Institute, Maxwell School of Citizenship and Public Affairs, Syracuse University, 314 Lyman  
48 Hall, Syracuse, NY 13244-1020, USA

49 Email: [sdlandes@maxwell.syr.edu](mailto:sdlandes@maxwell.syr.edu)  
50  
51

52  
53 Word count: 3,624  
54  
55  
56  
57

## Abstract

Objective: To determine whether coding a developmental disability as the underlying cause of death obscures mortality trends of adults with developmental disability.

Design: National Vital Statistics System 2012-2016 U.S. Multiple Cause-of-Death Mortality files.

Setting: United States.

Participants: Adults with a developmental disability indicated on their death certificate aged 18 through 103 at the time of death. The study population included 33,154 adults who died between January 1, 2012 and December 31, 2016.

Primary outcome and measures: Decedents with a developmental disability coded as the underlying cause of death on the death certificate were identified utilizing an ICD-10 code for intellectual disability, cerebral palsy, Down syndrome, or other developmental disability. Death certificates that coded a developmental disability as the underlying cause of death were revised utilizing a sequential underlying cause of death revision process.

Results: There were 33,154 decedents with developmental disability: 7,901 with intellectual disability, 11,895 with cerebral palsy, 9,114 with Down syndrome, 2,479 with other developmental disabilities, and 1,765 with multiple developmental disabilities. Among all decedents, 48.5% had a developmental disability coded as the underlying cause of death, obscuring higher rates of choking deaths among all decedents, and dementia and Alzheimer disease among decedents with Down syndrome.

Conclusion: Death certificates that recorded the developmental disability in Part I of the death certificate were more likely to code disability as the underlying cause of death. While revising these death certificates provides a short-term corrective to mortality trends for this population, the severity and extent of this problem warrants a long-term change involving more precise instructions to record developmental disabilities only in Part II of the death certificate.

### Strengths and limitations of this study

- This study revises death certificates that had developmental disability coded as underlying cause of death.
- This study provides evidence that coding developmental disability as underlying cause of death obscures often preventable, diseases or injuries other than disability that initiated the sequence of events leading to death.
- The high percentage of death certificates coded with a developmental disability as the underlying cause of death reveals the need to revise death certificates for adults with developmental disability prior to reporting mortality trends.
- Since the study population only includes decedents who had a developmental disability recorded on their death certificate, it is not inclusive of all decedents with a developmental disability in the U.S

- Limitations to retrospective revising of death certificates highlight the need for a long-term solution involving formal changes to policies guiding coding of developmental disability on death certificates.

For peer review only

1  
2  
3  
4  
5  
6  
7  
8  
9  
10  
11  
12  
13  
14  
15  
16  
17  
18  
19  
20  
21  
22  
23  
24  
25  
26  
27  
28  
29  
30  
31  
32  
33  
34  
35  
36  
37  
38  
39  
40  
41  
42  
43  
44  
45  
46  
47  
48  
49  
50  
51  
52  
53  
54  
55  
56  
57  
58  
59  
60

1  
2  
3 The Obscuring Effect of Coding Developmental Disability as the Underlying Cause of Death on  
4 Mortality Trends for Adults with Developmental Disability: A Cross-Sectional Study Utilizing  
5 U.S. Mortality Data from 2012 to 2016  
6  
7

8 Public health and preventive care efforts aimed at reducing premature mortality rely on  
9 population mortality data from death certificates.<sup>1,2</sup> Thus, it is imperative that death certificates  
10 accurately identify a valid and informative underlying cause of death (UCOD), the disease or  
11 injury that initiated the causal sequence of events leading to death. Beyond general concerns with  
12 the overall accuracy of death certificate data,<sup>3-5</sup> researchers express specific concern regarding  
13 the frequency in which the UCOD identifies a cause that is not valid or informative for public  
14 health and preventive care efforts aimed at reducing premature mortality.<sup>2,6,7</sup> One such cause of  
15 concern occurs when decedents with developmental disability have their disability coded as their  
16 UCOD.<sup>8-14</sup>  
17  
18  
19  
20  
21  
22  
23  
24  
25  
26  
27

28 Developmental disabilities comprise a diverse array of conditions that originate at birth or  
29 during the early developmental part of life - intellectual disability, cerebral palsy, Down  
30 syndrome, autism, as well as other chromosomal abnormalities.<sup>15</sup> These disabilities are  
31 attributable to physical, learning, language, or behavioral impairments, directly impact daily  
32 functioning, and extend across a person's life course.<sup>15,16</sup> Developed by the World Health  
33 Organization (WHO) to facilitate global medical communication and research, the International  
34 Statistical Classification of Diseases and Related Health Problems, Tenth Revision (ICD-10)  
35 classifies developmental disabilities variably as mental and behavioral disorders in the cases of  
36 intellectual disability, cerebral palsy, and autism, or as chromosomal or congenital abnormalities  
37 in the cases of Down syndrome and spina bifida.<sup>17</sup>  
38  
39  
40  
41  
42  
43  
44  
45  
46  
47  
48  
49  
50

51 Longevity for individuals with developmental disabilities improved since the early 1960s,  
52 resulting in a larger percentage of adults in this population now living into their 60s.<sup>18-22</sup> Despite  
53  
54  
55  
56  
57  
58  
59  
60

1  
2  
3 this improvement, on average, research informs that adults with developmental disability die 20-  
4  
5 25 years earlier than those in the general population.<sup>18,19,21</sup> There is increasing consensus that  
6  
7 developmental disabilities *should not* be considered a valid UCOD, as doing so prohibits  
8  
9 identification of the preventable medical cause of death, and is not advantageous to public health  
10  
11 or preventive care efforts.<sup>2,8-15,23</sup> Instead, the goal in coding the UCOD on death certificates for  
12  
13 persons with developmental disability should be to identify the specific, and often preventable,  
14  
15 disease or injury other than disability that initiated the sequence of events leading to death.  
16  
17  
18

19 Cerebral palsy offers insight to the limitations of coding a developmental disability as an  
20  
21 UCOD. Cerebral palsy describes a group of various permanent non-progressive motor disorders  
22  
23 which stem from an injury to or malfunction in the developing brain and vary in severity, cause,  
24  
25 and presentation.<sup>24</sup> Besides the motor disorders that cause activity limitations, there can be  
26  
27 associated conditions that accompany the diagnosis of cerebral palsy such as epilepsy or  
28  
29 problems with sensation, cognition, communication, and behavior. People with cerebral palsy  
30  
31 also have risk factors for general health conditions shared with the general population, such as  
32  
33 chronic heart disease.<sup>25</sup> Due to a higher prevalence of gastroesophageal reflux and/or dysphagia  
34  
35 among adults with moderate to severe forms of cerebral palsy, there is increased risk among this  
36  
37 population for aspiration on either saliva, food, or gastric contents leading to pneumonia or  
38  
39 pneumonitis, and subsequent death.<sup>26,27</sup> In the event that an individual with cerebral palsy  
40  
41 aspirates on food, develops pneumonia, and dies, it is not useful to identify the UCOD as  
42  
43 cerebral palsy. Doing so conceals the fact that death was due to aspiration and subsequent  
44  
45 development of pneumonia, and fails to differentiate this causal pathway from other causal  
46  
47 pathways such as arteriosclerotic heart disease leading to acute myocardial infarction and death.  
48  
49  
50  
51  
52  
53  
54 As this example illustrates, coding a developmental disability as the UCOD is  
55  
56  
57  
58  
59  
60

1  
2  
3 uninformative,<sup>2,28,29</sup> and, as Trollor and colleagues<sup>12</sup> contend, “obscures” actual mortality trends  
4 related to preventable conditions that need increased attention in public health or preventive care  
5 efforts.  
6  
7  
8  
9

10 Prior studies report the prevalence and obscuring effect of coding a developmental  
11 disability as the UCOD. Internationally, 16% of persons with developmental disability in  
12 general,<sup>12</sup> and between 34% and 56% of persons with cerebral palsy in particular,<sup>8,30</sup> had their  
13 disability coded as their UCOD. Among the U.S. population, 20% of decedents with an  
14 intellectual disability,<sup>10</sup> and 21% of decedents with Down syndrome,<sup>31</sup> had their disability coded  
15 as their UCOD. Two studies, from Canada<sup>14</sup> and Australia,<sup>12</sup> that mention the obscuring effect of  
16 this practice on mortality trends report a substantial increase in deaths from respiratory disease  
17 after revising death certificates coded with a developmental disability as the UCOD. To date,  
18 researchers have not detailed the obscuring effect of coding a developmental disability as the  
19 UCOD on mortality trends for adults with developmental disability in the U.S. To determine the  
20 severity of this problem, we compare mortality trends for adult decedents with developmental  
21 disability using the originally reported and a revised UCOD from U.S. death certificate data.  
22  
23  
24  
25  
26  
27  
28  
29  
30  
31  
32  
33  
34  
35  
36

## 37 **Methods**

### 38 *Data*

39  
40  
41  
42 Death certificate data for this study are from the National Vital Statistics System 2012-  
43 2016 U.S. Multiple Cause-of-Death Mortality files. As mortality coding in the U.S. converted to  
44 ICD-10 in 2009,<sup>32</sup> this study included the death certificates for adults aged 18-103 at the time of  
45 death that recorded an ICD-10 code for a developmental disability as the UCOD, or as a multiple  
46 cause of death (other co-morbidities present at time of death) - intellectual disability (F70-79),  
47  
48  
49  
50  
51  
52  
53  
54  
55  
56  
57  
58  
59  
60



1  
2  
3 cerebral palsy (G80), Down syndrome (Q90), and other developmental disabilities (F80-89, Q91-  
4  
5 99). This resulted in a sample of 33,154 death certificates over the 5-year period.  
6

### 7 8 *Sequential UCOD Revision Process* 9

10 If the UCOD listed on the death certificate was not coded as a developmental disability, it  
11 was accepted as valid and retained for analysis. In the event that the developmental disability  
12 was identified as the UCOD, it was revised by the study team utilizing a sequential UCOD  
13 revision process.<sup>8,12</sup> We chose to identify a singular UCOD code to construct a straightforward  
14 methodology, recognizing some recent studies contend that multiple morbidity data could be  
15 helpful, especially in understanding complex conditions with co-morbidities, as in dementia and  
16 Alzheimer disease.<sup>33,34</sup> In the instances when the UCOD was revised, we identified a valid  
17 UCOD by working sequentially from the last line to the first line of Part I of the death certificate,  
18 moving from the first to the last listed code per line. ICD-10 codes that the U.S. Centers for  
19 Disease Control and Prevention (CDC) states are not to be used as the UCOD were not  
20 considered valid options for the revised UCOD.<sup>35</sup> In addition, ICD-10 Chapter 18 R-codes were  
21 only utilized for the UCOD if no other valid UCOD was listed in Part I of the death certificate.<sup>2</sup>  
22 As they record co-morbidities present at the time of death that were not part of the sequence of  
23 events leading to death, ICD-10 codes in Part II of the death certificate were not considered in  
24 the revision process.  
25

26 The following examples demonstrate our sequential UCOD revision process. The first example  
27 is a decedent who had J96.9 (Respiratory failure, unspecified) recorded on Line 1, Position 1;  
28 J69.0 (Pneumonitis due to inhalation of food and vomit) recorded on Line 2, Position 1; and F79  
29 (Unspecified intellectual disability) on Line 3, Position 1; with F79 identified as the UCOD. In  
30 this instance, working sequentially from the last line (Line 3), we would dismiss F79 as it is not a  
31  
32  
33  
34  
35  
36  
37  
38  
39  
40  
41  
42  
43  
44  
45  
46  
47  
48  
49  
50  
51  
52  
53  
54  
55  
56  
57  
58  
59  
60

1  
2  
3 valid UCOD, and identify J69.0 on Line 2 as the first listed valid UCOD. A second example,  
4  
5 involving a more complex revision process, is for a decedent who had T17.9 (Foreign body in  
6  
7 respiratory tract, part unspecified) recorded on Line 1, Position 1; W80 (Inhalation and ingestion  
8  
9 of other objects causing obstruction of respiratory tract – commonly termed choking) recorded  
10  
11 on Line 1, Position 2; G80.9 (Cerebral palsy, unspecified) recorded on Line 2, Position 1; and  
12  
13 R56.8 (Other and unspecified convulsions) listed in Line 3, Position 1; with G80.9 identified as  
14  
15 the UCOD. In this instance, we would initially identify R56.8 as the UCOD. However, as R-  
16  
17 codes are unspecified causes and not useful for public health,<sup>2</sup> we would continue looking for a  
18  
19 more valid UCOD. We would dismiss G80.9 as it is not a valid UCOD, dismiss T17.9 as CDC  
20  
21 rules do not allow this ICD-10 code to be an UCOD,<sup>35</sup> and identify W80 as the valid UCOD,  
22  
23 superseding R56.8. In instances where no valid UCOD was present in Part I of the death  
24  
25 certificate, as in the cases where the death certificate only listed an ICD-10 code for a  
26  
27 developmental disability, we identified the UCOD as ‘Unknown.’ *Analytic Plan*

28  
29  
30  
31  
32  
33 All analysis was conducted using STATA Version 15.0 (College Station, TX). Results  
34  
35 are presented by developmental disability group due to disparate cause of death trends –  
36  
37 intellectual disability, cerebral palsy, Down syndrome, other developmental disability, and  
38  
39 multiple developmental disabilities. For each group, we report: UCOD percentages by ICD-10  
40  
41 chapter code for all death certificates prior to and after revisions; changes in the cause of death  
42  
43 rank order; and percentage point differences between original and revised data. We also detail  
44  
45 the leading specific underlying causes of death within ICD-10 chapters reflecting the most  
46  
47 drastic changes.  
48  
49  
50

#### 51 *Patient and Public Involvement*

52  
53  
54  
55  
56  
57

1  
2  
3 Patients and public were not involved in any aspect of this study, inclusive of  
4 development of research question and design, outcomes measures, analytic plan, and  
5 interpretation of results. As all study participants were deceased and data is anonymous, results  
6 cannot and will not be disseminated to study participants.  
7  
8  
9  
10

## 11 **Results**

12 Full comparative results of the original and revised UCOD by ICD-10 Chapter code are  
13 presented for each disability group in Tables 1-5. Though detailed in the text, information on  
14 specific underlying causes of death per ICD-10 Chapter are not included in the tables. We  
15 compared results from aggregated data to results from each specific year prior and subsequent to  
16 revisions. The only dissimilarity was a slight increase in the percentage of decedents with Down  
17 syndrome who had Q90 coded as their UCOD beginning in 2014.  
18  
19  
20  
21  
22  
23  
24  
25  
26  
27

28 There were 7,901 decedents with intellectual disability, 11,895 decedents with cerebral  
29 palsy, 9,114 decedents with Down syndrome, 2,479 decedents with other developmental  
30 disabilities, and 1,765 decedents with multiple developmental disabilities. The UCOD was coded  
31 as a developmental disability, and thus was revised, on the death certificates of 48.52% of all  
32 decedents with a developmental disability, but varied by disability type - 25.88% of decedents  
33 with intellectual disability, 59.53% of decedents with cerebral palsy, 58.99% of decedents with  
34 Down syndrome, 26.42% of decedents with other developmental disabilities, and 52.69% of  
35 decedents with multiple developmental disabilities.  
36  
37  
38  
39  
40  
41  
42  
43  
44  
45  
46

47 As expected, after revising the death certificates, there was a steep decline in the  
48 percentage and rank order of decedents in each disability group with an UCOD in the ICD-10  
49 chapter inclusive of their disability. Due to these revisions, the percentages increased for all other  
50 ICD-10 chapters for all disability groups. We detail the most remarkable changes.  
51  
52  
53  
54  
55  
56  
57  
58  
59  
60

1  
2  
3 Across groups, the percentage of deaths caused by diseases of the respiratory system,  
4 ICD-10 Chapter X, rose dramatically after the revision: from 15.37% to 23.67% for decedents  
5 with intellectual disability; from 8.95% to 29% for decedents with cerebral palsy; from 8.56% to  
6 27% for decedents with Down syndrome; from 8.67% to 16.3% for decedents with other  
7 developmental disabilities; and from 12.01% to 29.24% for decedents with multiple  
8 developmental disabilities. As a result, respiratory deaths rose from the 3<sup>rd</sup> to the 1<sup>st</sup> leading  
9 cause of death for decedents with intellectual disability, cerebral palsy, Down syndrome, and  
10 multiple developmental disabilities; and from the 5<sup>th</sup> to the 2<sup>nd</sup> leading cause of death for  
11 decedents with other developmental disabilities such as autism.  
12  
13  
14  
15  
16  
17  
18  
19  
20  
21  
22  
23

24 For all disability groups, the most prevalent underlying causes of death identified among  
25 diseases of the respiratory system were J69 Pneumonitis due to inhalation of food/vomit and  
26 J18.9 Pneumonia, unspecified organism. The percentage of deaths from pneumonitis due to  
27 inhalation of food/vomit increased from: 5.73% to 9.57% among decedents with intellectual  
28 disability; 3.14% to 10.08% among decedents with cerebral palsy; 5.43% to 9.84% among  
29 decedents with Down syndrome; 3.03% to 5.77% among decedents with other developmental  
30 disabilities; and 5.72% to 12.18% among decedents with multiple developmental disabilities.  
31 The percentage of deaths from pneumonia, unspecified organism rose from: 4.38% to 7.1%  
32 among decedents with intellectual disability; 2.3% to 8.53% among decedents with cerebral  
33 palsy; 0.07% to 10.19% among decedents with Down syndrome; 2.02% to 4.4% among  
34 decedents with other developmental disabilities; and 2.21% to 8.67% among decedents with  
35 multiple developmental disabilities.  
36  
37  
38  
39  
40  
41  
42  
43  
44  
45  
46  
47  
48  
49  
50

51 To varying degrees, deaths from external causes of mortality, ICD-10 Chapter XX,  
52 increased in percent and rank order for four of the disability groups: from 2.67% to 7.53% (rank  
53  
54  
55  
56  
57  
58  
59  
60

1  
2  
3 order increase from 9 to 3) for decedents with intellectual disability; from 1.65% to 5.89% (rank  
4  
5 order increase from 9 to 5) for decedents with cerebral palsy; from 7.34% to 8.75% (rank order  
6  
7 increase from 7 to 4) for decedents with other developmental disabilities; from 1.76% to 6.06%  
8  
9 (rank order increase from 10 to 6) for decedents with multiple developmental disabilities. While  
10  
11 the percentage of deaths from external causes of mortality rose from 2.79% to 3.86% for  
12  
13 decedents with Down syndrome, the rank order dropped one position from 5 to 6.  
14  
15

16  
17 For each disability group, the most prevalent underlying causes of death in the external  
18  
19 causes chapter were W78-80, Accidental inhalation and ingestion of food or other objects  
20  
21 causing obstruction of the respiratory tract. The percentage of deaths from accidental choking  
22  
23 increased: from 0.1% to 4.80% among decedents with intellectual disability; from 0.02% to  
24  
25 3.76% among decedents with cerebral palsy; from 1.32% to 2.28% among decedents with Down  
26  
27 syndrome; from 3.19% to 4.48% among decedents with other developmental disabilities; and  
28  
29 from 0.17% to 4.09% among decedents with multiple developmental disabilities.  
30  
31

32  
33 One other remarkable finding among all disability groups regarded the percentage of  
34  
35 decedents who had either an unknown or an imprecise UCOD. Unknown causes of death were  
36  
37 recorded when no other ICD-10 code was listed in Part I of the death certificate other than  
38  
39 disability. Imprecise underlying causes occurred when no other ICD-10 code was listed in Part I  
40  
41 of the death certificate other than the developmental disability and/or a single or multiple R code  
42  
43 from Chapter XVIII. As a result, the UCOD was either unknown or imprecise for: 4.96% of  
44  
45 decedents with intellectual disability; 17.17% of decedents with cerebral palsy; 8.88% of  
46  
47 decedents with Down syndrome; 8.51% of decedents with other developmental disabilities; and  
48  
49 11.51% of decedents with multiple developmental disabilities. This means that even after  
50  
51  
52  
53  
54  
55  
56  
57  
58  
59  
60

1  
2  
3 revision, the death certificate provided little to no indication of the disease or injury that initiated  
4  
5 the sequence of events leading to the death of these individuals.  
6  
7

8 Particular to decedents with Down syndrome, deaths from diseases of the nervous  
9  
10 system, ICD-10 Chapter VI, rose from 5.31% to 13.18% (rank order increase from 4 to 3). The  
11  
12 most prevalent UCOD for decedents with Down syndrome in this chapter, G30.9 Alzheimer  
13  
14 disease, unspecified, increased from 3.27% to 9.5%. In addition, contrary to trends among the  
15  
16 other disability groups, deaths from mental, behavioral, and neurodevelopmental disorders, ICD-  
17  
18 10 Chapter V, rose from 1.73% to 11.82% (rank order increase from 10 to 4). The most prevalent  
19  
20 cause of death in this chapter, F03 Unspecified dementia, increased from 1.62% to 11.4%.  
21  
22

## 23 24 **Discussion**

25  
26 In 2012-2016 U.S. death certificate data, the coding of a developmental disability as the  
27  
28 UCOD is widespread, but varied among specific disability groups. Results from this study  
29  
30 expose that the practice of coding a developmental disability as the UCOD on a death certificate  
31  
32 obscures the higher prevalence of choking related deaths (coded as either pneumonitis due to  
33  
34 inhalation of food/vomit, or accidental choking) among all developmental disability groups, and  
35  
36 obscures dementia and Alzheimer disease related deaths among decedents with Down syndrome.  
37  
38

39  
40 In instances when death certificates that code a developmental disability as the UCOD  
41  
42 are not revised, population mortality trends for persons with various types of developmental  
43  
44 disability are likely to be inaccurate and may, therefore, misinform public health and preventive  
45  
46 care efforts aimed at preventing premature mortality. The primary strength of this study is that  
47  
48 results demonstrate that the prominence of choking related deaths as a mortality risk among  
49  
50 persons with developmental disability was severely underestimated prior to revision. As revision  
51  
52 of the UCOD revealed, similar to the older adult population,<sup>36-38</sup> careful attention is needed to  
53  
54  
55  
56  
57  
58  
59  
60

1  
2  
3 attend to the heightened risk of preventable choking related deaths among persons with  
4 developmental disability.<sup>15,39,40</sup> Thus, it is of the utmost importance that public health and  
5 preventive care efforts focus on management of the swallowing function among this population.  
6  
7 Physicians conducting routine exams should be screening for swallowing disorders,  
8 abnormalities in the cough and gag reflex, as well as respiratory distress.<sup>15,40</sup> Mortality data  
9  
10 based upon original death certificates, often coding developmental disability as UCOD, fail to  
11 reveal this important mortality trend.  
12  
13  
14  
15  
16  
17  
18

19  
20 Unfortunately, current CDC instructions and WHO guidelines for completing death  
21 certificates permit identifying a developmental disability as the UCOD in at least two known  
22 instances.<sup>41,42</sup> ICD-10 codes for intellectual disability (F70-79) are permitted as UCOD in  
23 instances that the actual UCOD is unknown. In addition, Down syndrome is suggested as the  
24 UCOD in the event the death certificate indicates unspecified dementia or Alzheimer disease.  
25  
26 Continued permission of the practice of coding a developmental disability as the UCOD  
27 demands both short-term and long-term redress. As this study highlights, analysis of mortality  
28 trends for adults with developmental disability must recognize the obscuring effect of coding a  
29 developmental disability as the UCOD and take the necessary steps to revise the UCOD on these  
30 death certificates prior to reporting findings. The sequential UCOD revision process utilized in  
31 this study reduces obfuscation of mortality trends among populations with developmental  
32 disabilities in the short-term.  
33  
34  
35  
36  
37  
38  
39  
40  
41  
42  
43  
44  
45  
46

47 While revising death certificates for adults with developmental disability is a necessary  
48 short-term solution, the primary limitations of this study indicate that retrospective revision is not  
49 a sufficient long-term solution. The first limitation regards accuracy of revised death certificates.  
50  
51 Although sequentially revising the UCOD for U.S. death certificates that identify a  
52  
53  
54  
55  
56  
57  
58  
59  
60

1  
2  
3 developmental disability as the UCOD increases the reliability of mortality trends for this  
4  
5 population, it is not possible to verify the accuracy of the revised UCOD without access to the  
6  
7 medical records of the decedent and the medical personnel that completed the death certificate.  
8  
9 Although the only remedy present at the time, the method of retrospectively revising the UCOD  
10  
11 should not be viewed as a sustainable long-term strategy for surveilling mortality trends among  
12  
13 this population. Instead, focus should be on ensuring that at the time of death, the medical  
14  
15 certifier of the death certificate, the individual completing the medical portion of the death  
16  
17 certificate, accurately identifies the disease process or injury, other than developmental  
18  
19 disability, that initiated the chain of events leading to death. In all U.S. states, this would be  
20  
21 either the attending physician present at the time of death or the decedent's personal physician,  
22  
23 with some states allowing the chief medical officer of medical facilities to certify.<sup>43,44</sup> In  
24  
25 instances when death occurs without an attending physician present, cause of death is unknown,  
26  
27 or death occurs by accident, suicide, or homicide, the individual responsible for certifying the  
28  
29 cause of death would be the medical examiner or coroner, with responsibility varying by U.S.  
30  
31 state.<sup>43,45</sup> In addition, it is unlikely that the death certificates of all decedents with a  
32  
33 developmental disability included an ICD-10 code for developmental disability. Based on  
34  
35 inconsistencies regarding the proper location to code developmental disability on death  
36  
37 certificates we observed in this study, it is obvious that there is confusion regarding where to  
38  
39 record a developmental disability on the death certificate. This confusion may result in the  
40  
41 medical certifier not recording the developmental disability on the death certificate at all. Thus,  
42  
43 the results from this study only describe mortality trends for decedents with developmental  
44  
45 disability who had their disability recorded on their death certificate, and do not account for  
46  
47 possible state level variation in the cause of death certification process.  
48  
49  
50  
51  
52  
53  
54  
55  
56  
57  
58  
59  
60



1  
2  
3 In order to fully address these limitations, it is necessary to move beyond retrospective  
4 remedies, and formally change instructions for coding a developmental disability on the death  
5 certificate. As CDC instructions on cause of death coding are developed based upon and in  
6 cooperation with WHO guidelines,<sup>46,47</sup> change is needed at both a national and international  
7 level. Due to concerns that population representative datasets rarely include adults with  
8 developmental disability, which limits surveillance of morbidity and mortality trends among this  
9 population,<sup>48,49</sup> it is imperative to continue recording developmental disabilities on death  
10 certificates. Per CDC and WHO guidelines, Part II of the death certificate is intended for the  
11 recording of co-morbidities that were present at the time of death, but were not part of the  
12 sequence of events leading to death.<sup>41,42</sup> To ensure that developmental disabilities are recorded  
13 on the death certificate, but not identified as the UCOD, instructions for completing death  
14 certificates should specify that developmental disabilities should not be recorded in Part I or  
15 permitted as the UCOD. Instead, developmental disabilities should be recorded in Part II of the  
16 death certificate.<sup>10,11,13</sup> Evidence from this study supports this recommendation. Among the death  
17 certificates that recorded a developmental disability in Part I (with or without also recording a  
18 developmental disability in Part II), 82% coded developmental disability as the UCOD. In  
19 contrast, among the death certificates that recorded a developmental disability only in Part II,  
20 19% coded developmental disability as the UCOD. This proposed change would preserve the  
21 ability to surveil mortality trends for this population by ensuring the recording of the  
22 developmental disability on the death certificate while minimizing the possibility a  
23 developmental disability is coded as the UCOD. Changing the instructions for coding  
24 developmental disability would also increase the accuracy of mortality data for adults with  
25 developmental disability by deterring the coding of a developmental disability as an UCOD. As a

1  
2  
3 result, the death certificates of this population would more accurately represent actual mortality  
4  
5 trends, allowing for better-informed public health and preventive care efforts to reduce  
6  
7 premature mortality for this population.  
8  
9  
10  
11  
12  
13  
14  
15  
16  
17  
18  
19  
20  
21  
22  
23  
24  
25  
26  
27  
28  
29  
30  
31  
32  
33  
34  
35  
36  
37  
38  
39  
40  
41  
42  
43  
44  
45  
46  
47  
48  
49  
50  
51  
52  
53  
54  
55  
56  
57  
58  
59  
60

For peer review only

## Acknowledgements

Author Contributions: Landes had full access to all of the data in the study and takes responsibility for the integrity of the data and the accuracy of the data analysis.

Concept and design: Landes, Stevens, Turk.

Acquisition of data: Landes

Analysis of data: Landes, Stevens.

Interpretation of data: Landes, Stevens, Turk.

Drafting of the manuscript: Landes, Stevens.

Critical revision of the manuscript for important intellectual content: Landes, Stevens, Turk.

Competing Interests: None.

Funding sources: No funding was received for this project.

Data sharing statement: All data is publicly available from the Centers for Disease Control and Prevention (CDC).

## References

1. Jha P. Counting the dead is one of the world's best investments to reduce premature mortality. *Hypothesis*. 2012;10(1):e3.
2. Naghavi M, Makela S, Foreman K, O'Brien J, Pourmalek F, Lozano R. Algorithms for enhancing public health utility of national causes-of-death data. *Popul Health Metr*. 2010;8(1):9.
3. Messite J, Stellman SD. Accuracy of death certificate completion: The need for formalized physician training. *JAMA*. 1996;275(10):794-796.
4. Maudsley G, Williams EMI. 'Inaccuracy' in death certification – where are we now? *J Public Health (Oxf)*. 1996;18(1):59-66.
5. Kuller LH. The use of existing databases in morbidity and mortality studies. *Am J Public Health*. 1995;85(9):1198-1200.
6. Foreman KJ, Naghavi M, Ezzati M. Improving the usefulness of US mortality data: new methods for reclassification of underlying cause of death. *Popul Health Metr*. 2016;14:14.
7. Murray CJL, Lopez AD, Harvard School of Public Health, World Health Organization. *The global burden of disease: a comprehensive assessment of mortality and disability from diseases, injuries, and risk factors in 1990 and projected to 2020: summary*. Cambridge, MA: Harvard School of Public Health on behalf of the World Health Organization and World Bank; 1996.
8. Duruflé-Tapin A, Colin A, Nicolas B, Lebreton C, Dauvergne F, Gallien P. Analysis of the medical causes of death in cerebral palsy. *Ann of PhysRehabil Med*. 2014;57(1):24-37.
9. Goldman SE, Urbano RC, Hodapp RM. Determining the amount, timing and causes of mortality among infants with Down syndrome. *J of Intellect Disabil Res*. 2011;55(1):85-94.
10. Landes SD, Peek CW. Death by mental retardation? The influence of ambiguity on death certificate coding error for adults with intellectual disability. *J of Intellect Disabil Res*. 2013;57(12):1183-1190.
11. Stirton FD, Heslop P. Medical Certificates of Cause of Death for people with intellectual disabilities: A systematic literature review. *J Appl Res Intellect Disabil*. 2018;0(0).
12. Trollor J, Srasuebku P, Xu H, Howlett S. Cause of death and potentially avoidable deaths in Australian adults with intellectual disability using retrospective linked data. *BMJ Open*. 2017;7(2).
13. Tyrer F, McGrother C. Cause-specific mortality and death certificate reporting in adults with moderate to profound intellectual disability. *J Intellect Disabil Res*. 2009;53(11):898-904.
14. Baird PA, Sadovnick AD. Underlying cause of death in Down syndrome: Accuracy of British Columbia death certificate data. *Can J Public Health*. 1990;81(November/December):456-461.
15. Rubin IL, Crocker AC. *Medical care for children & adults with developmental disabilities*. Baltimore, MD: Paul H. Brookes Publishing; 2006.
16. CDC. Facts about developmental disabilities. 2018; <https://www.cdc.gov/ncbddd/developmentaldisabilities/facts.html>. Accessed November 30, 2018.

17. WHO. *International Statistical Classification of Diseases and Related Health Problems-10th Revision*. Vol 1. Geneva: World Health Organization; 2013.
18. O'Leary L, Cooper S-A, Hughes-McCormack L. Early death and causes of death of people with intellectual disabilities: A systematic review. *J Appl Res Intellect Disabil*. 2018;31(3):325-342.
19. Lauer E, McCallion P. Mortality of People with Intellectual and Developmental Disabilities from Select US State Disability Service Systems and Medical Claims Data. *J Appl Res Intellect Disabil*. 2015;28(5):394-405.
20. Janicki MP, Dalton AJ, Henderson CM, Davidson PW. Mortality and morbidity among older adults with intellectual disability: health services considerations. *Disabil Rehabil*. 1999;21(5):284-294.
21. Lauer E, Heslop P, Hoghton M. Identifying and addressing disparities in mortality: US and UK perspectives. *Int Rev Res Dev Disabil*. 2015;48.
22. Landes SD. The Intellectual Disability Mortality Disadvantage: Diminishing With Age? *Am J Intellect Dev Disabil*. 2017;122(2):192-207.
23. Hosking FJ, Carey IM, Shah SM, et al. Mortality Among Adults With Intellectual Disability in England: Comparisons With the General Population. *Am J Public Health*. 2016;106(8):1483-1490.
24. Rosenbaum PP, N., Leviton A, Goldstein M, et al. A report: the definition and classification of cerebral palsy April 2006. *Dev Med Child Neurol*. 2007;49(SUPPL.09):8-14.
25. Peterson MD, Ryan JM, Hurvitz EA, Mahmoudi E. Chronic conditions in adults with cerebral palsy. *JAMA*. 2015;314(21):2303-2305.
26. Fortuna RJ, Holub A, Turk MA, Meccarello J, Davidson PW. Health conditions, functional status and health care utilization in adults with cerebral palsy. *Fam Pract*. 2018.
27. Henderson CM, Rosasco M, Robinson LM, et al. Functional impairment severity is associated with health status among older persons with intellectual disability and cerebral palsy. *J Intellect Disabil Res*. 2009;53(11):887-897.
28. Shavelle RM, Strauss DJ, Pickett J. Causes of Death in Autism. *J Autism Dev Disord*. 2001;31(6):569-576.
29. Strauss D, Cable W, Shavelle R. Causes of excess mortality in cerebral palsy. *Dev Med Child Neurol*. 1999;41(9):580-585.
30. Maudsley G, Hutton JL, Pharoah POD. Cause of death in cerebral palsy: a descriptive study. *Arch Dis Child*. 1999;81(5):390.
31. Miodrag N, Silverberg SE, Urbano RC, Hodapp RM. Deaths Among Children, Adolescents, and Young Adults with Down Syndrome. *J App Res Intellect Disabil*. 2013;26(3):207-214.
32. Dimick C. Mortality coding marks 10 years of ICD-10. *Journal AHIMA*. 2009;80(7):30-33.
33. Browne J, Edwards DA, Rhodes KM, Brimicombe DJ, Payne RA. Association of comorbidity and health service usage among patients with dementia in the UK: a population-based study. *BMJ Open*. 2017;7(3).
34. Park J. Mortality from Alzheimer's disease in Canada: A multiple-cause-of-death analysis, 2004 to 2011. *Health Reps*. 2016;27(5):17-21.

- 1
- 2
- 3
- 4 35. National Center for Health Statistics. Part 2c. ICD-10 ACME decision tables for
- 5 classifying underlying causes of death. 2016;
- 6 [https://www.cdc.gov/nchs/data/dvs/2c\\_2016.pdf](https://www.cdc.gov/nchs/data/dvs/2c_2016.pdf). Accessed June 11, 2018.
- 7 36. Berzlanovich AM, Fazeny-Dörner B, Waldhoer T, Fasching P, Keil W. Foreign body
- 8 asphyxia. *Am J Prev Med*. 2005;28(1):65-69.
- 9 37. Kramarow E, Warner M, Chen L-H. Food-related choking deaths among the elderly. *Inj*
- 10 *Prev*. 2014;20(3):200.
- 11 38. Wu W-S, Sung K-C, Cheng T-J, Lu T-H. Associations between chronic diseases and
- 12 choking deaths among older adults in the USA: A cross-sectional study using multiple
- 13 cause mortality data from 2009 to 2013. *BMJ Open*. 2015;5(11).
- 14 39. Prasher V, Janicki M, eds. *Physical health of adults with intellectual disability*. Malden,
- 15 MA: Blackwell; 2002.
- 16 40. Marik PE. Aspiration Pneumonitis and Aspiration Pneumonia. *N Engl J Med*.
- 17 2001;344(9):665-671.
- 18 41. National Center for Health Statistics. Part 2a. Instructions for classifying the underlying
- 19 causes of death: ICD-10. 2017; [https://www.cdc.gov/nchs/nvss/instruction\\_manuals.htm](https://www.cdc.gov/nchs/nvss/instruction_manuals.htm).
- 20 Accessed June 11, 2018.
- 21 42. WHO. *International Statistical Classification of Diseases and Related Health Problems-*
- 22 *10th Revision*. Vol 5. 2nd ed. Geneva: World Health Organization; 2016.
- 23 43. National Center for Health Statistics. Physicians' handbook on medical certification of
- 24 death. 2003; [https://www.cdc.gov/nchs/data/misc/hb\\_cod.pdf](https://www.cdc.gov/nchs/data/misc/hb_cod.pdf). Accessed November 29,
- 25 2018.
- 26 44. Brooks EG, Reed KD. Principles and pitfalls: a guide to death certification. *Clin Med &*
- 27 *Res*. 2015;13(2):74-82.
- 28 45. Warner M, Paulozzi LJ, Nolte KB, Davis GG, Nelson LS. State Variation in Certifying
- 29 Manner of Death and Drugs Involved in Drug Intoxication Deaths. *Acad Forensic Pathol*.
- 30 2013;3(2):231-237.
- 31 46. CDC. Mortality data from the National Vital Statistics System. *MMWR Morb Mort Wkly*
- 32 *Rep*. 1989;38(8):118.
- 33 47. Xu J, Murphy SL, Kochanek KDK, Bastian BB, Arias E. Deaths: Final Data for 2016.
- 34 *Natl Vital Stat Rep*. 2018;67(5).
- 35 48. U.S. Public Health Service. *Closing the gap: A national blueprint for improving the*
- 36 *health of people with mental retardation. Report of the Surgeon General's conference on*
- 37 *health disparities and mental retardation*. Washington, DC: US Department of Health
- 38 and Human Services; February 2001.
- 39 49. Bonardi A, Lauer E, Mitra M, Bershady J, Taub S, Noblett C. *Expanding surveillance*
- 40 *of adults with intellectual disability in the US*. Center for Developmental Disabilities
- 41 Evaluation and Research (CDDER), E.K. Shrive Center University of Massachusetts
- 42 Medical School.; 2011.
- 43
- 44
- 45
- 46
- 47
- 48
- 49
- 50
- 51
- 52
- 53
- 54
- 55
- 56
- 57
- 58
- 59
- 60

Table 1: UCOD (UCOD) trends for decedents with intellectual disability, 2012-2016 U.S. Multiple Cause-of-Death Mortality files (N=7,901)

| ICD-10 Chapter                                                                                                   | Rank order change | Original UCOD | Revised UCOD | Absolute Difference |
|------------------------------------------------------------------------------------------------------------------|-------------------|---------------|--------------|---------------------|
| X. J00-J99 Diseases of the respiratory system                                                                    | 3 ↗ 1             | 15.37%        | 23.67%       | 8.30%               |
| IX. I00-I99 Diseases of the circulatory system                                                                   | 2 → 2             | 17.18%        | 20.45%       | 3.27%               |
| XX. V00-Y99 External causes of mortality                                                                         | 9 ↗ 3             | 2.67%         | 7.53%        | 4.86%               |
| VI. G00-G99 Diseases of the nervous system                                                                       | 5 ↗ 4             | 6.81%         | 7.39%        | 0.58%               |
| II. C00-D49 Neoplasms                                                                                            | 4 ↘ 5             | 7.00%         | 7.05%        | 0.05%               |
| IV. E00-E89 Endocrine, nutritional and metabolic diseases                                                        | 6 → 6             | 5.94%         | 6.66%        | 0.72%               |
| V. F01-F99 Mental, behavioral, and neurodevelopmental disorders*                                                 | 1 ↘ 7             | 30.92%        | 5.72%        | -25.20%             |
| XI. K00-K95 Diseases of the digestive system                                                                     | 7 ↘ 8             | 5.37%         | 5.71%        | 0.34%               |
| I. A00-B99 Certain infectious and parasitic diseases                                                             | 8 ↘ 9             | 3.24%         | 3.82%        | 0.58%               |
| XVIII. R00-R99 Symptoms, signs, and abnormal clinical and laboratory findings, not elsewhere classified          | 16 ↗ 10           | 0.00%         | 3.72%        | 3.72%               |
| XIV. N00-N99 Diseases of the genitourinary system                                                                | 10 ↘ 11           | 2.53%         | 3.47%        | 0.94%               |
| XVII. Q00-Q99 Congenital malformations, deformations, and chromosomal abnormalities                              | 11 ↘ 12           | 1.35%         | 1.57%        | 0.22%               |
| --- --- Unknown                                                                                                  | 16 ↗ 13           | 0.00%         | 1.24%        | 1.24%               |
| XIII. M00-M99 Diseases of the musculoskeletal system and connective tissue                                       | 12 ↘ 14           | 0.84%         | 0.92%        | 0.08%               |
| XII. L00-L99 Diseases of the skin and subcutaneous tissue                                                        | 13 ↘ 15           | 0.32%         | 0.48%        | 0.16%               |
| III. D50-D89 Diseases of the blood and blood-forming organs and certain disorders involving the immune mechanism | 13 ↘ 16           | 0.32%         | 0.42%        | 0.10%               |
| XVI. P00-P96 Certain conditions originating in the perinatal period                                              | 14 ↘ 17           | 0.11%         | 0.11%        | 0.00%               |
| VIII. H60-H95 Diseases of the ear and mastoid process                                                            | 15 ↘ 18           | 0.03%         | 0.04%        | 0.01%               |
| VII. H00-H59 Diseases of the eye and adnexa                                                                      | 15 ↘ 19           | 0.03%         | 0.03%        | 0.00%               |

\*Indicates ICD-10 Chapter inclusive of intellectual disability.

Table 2: UCOD (UCOD) trends for decedents with cerebral palsy, 2012-2016 U.S. Multiple Cause-of-Death Mortality files (N=11,895)

| ICD-10 Chapter |         |                                                                                                     | Rank order change | Original UCOD | Revised UCOD | Absolute Difference |
|----------------|---------|-----------------------------------------------------------------------------------------------------|-------------------|---------------|--------------|---------------------|
| X.             | J00-J99 | Diseases of the respiratory system                                                                  | 3 ↗ 1             | 8.95%         | 29.00%       | 20.05%              |
| IX.            | I00-I99 | Diseases of the circulatory system                                                                  | 2 → 2             | 9.42%         | 15.06%       | 5.64%               |
| ---            | ---     | Unknown                                                                                             | 17 ↗ 3            | 0.00%         | 11.71%       | 11.71%              |
| VI.            | G00-G99 | Diseases of the nervous system*                                                                     | 1 ↘ 4             | 62.05%        | 6.53%        | -55.52%             |
| XX.            | V00-Y99 | External causes of mortality                                                                        | 9 ↗ 5             | 1.65%         | 5.89%        | 4.24%               |
| XVIII.         | R00-R99 | Symptoms, signs, and abnormal clinical and laboratory findings, not elsewhere classified            | 17 ↗ 6            | 0.00%         | 5.46%        | 5.46%               |
| XI.            | K00-K95 | Diseases of the digestive system                                                                    | 5 ↘ 7             | 3.83%         | 5.15%        | 1.32%               |
| II.            | C00-D49 | Neoplasms                                                                                           | 4 ↘ 8             | 4.62%         | 4.72%        | 0.10%               |
| I.             | A00-B99 | Certain infectious and parasitic diseases                                                           | 6 ↘ 9             | 2.69%         | 3.99%        | 1.30%               |
| XIV.           | N00-N99 | Diseases of the genitourinary system                                                                | 11 ↗ 10           | 0.81%         | 3.40%        | 2.59%               |
| IV.            | E00-E89 | Endocrine, nutritional and metabolic diseases                                                       | 7 ↘ 11            | 2.02%         | 3.31%        | 1.29%               |
| XVII.          | Q00-Q99 | Congenital malformations, deformations, and chromosomal abnormalities                               | 8 ↘ 12            | 1.65%         | 1.79%        | 0.14%               |
| V.             | F01-F99 | Mental, behavioral and neurodevelopmental disorders                                                 | 10 ↘ 13           | 1.08%         | 1.43%        | 0.35%               |
| XIII.          | M00-M99 | Diseases of the musculoskeletal system and connective tissue                                        | 12 ↘ 14           | 0.55%         | 1.08%        | 0.53%               |
| XII.           | L00-L99 | Diseases of the skin and subcutaneous tissue                                                        | 15 → 15           | 0.14%         | 0.58%        | 0.44%               |
| III.           | D50-D89 | Diseases of the blood and blood-forming organs and certain disorders involving the immune mechanism | 14 ↘ 16           | 0.23%         | 0.43%        | 0.20%               |
| XVI.           | P00-P96 | Certain conditions originating in the perinatal period                                              | 13 ↘ 16           | 0.31%         | 0.43%        | 0.12%               |
| VIII.          | H60-H95 | Diseases of the ear and mastoid process                                                             | 16 ↘ 17           | 0.01%         | 0.02%        | 0.01%               |
| VII.           | H00-H59 | Diseases of the eye and adnexa                                                                      | 17 ↘ 18           | 0.00%         | 0.01%        | 0.01%               |

\*Indicates ICD-10 Chapter inclusive of cerebral palsy.



1  
2  
3  
4  
5  
6  
7  
8  
9  
10  
11  
12  
13  
14  
15  
16  
17  
18  
19  
20  
21  
22  
23  
24  
25  
26  
27  
28  
29  
30  
31  
32  
33  
34  
35  
36  
37  
38  
39  
40  
41  
42  
43  
44  
45  
46  
47

Table 3: UCOD (UCOD) trends for decedents with Down syndrome, 2012-2016 U.S. Multiple Cause-of-Death Mortality files (N=9,114)

| ICD-10 Chapter |         |                                                                                                     | Rank order change | Original UCOD | Revised UCOD | Absolute Difference |
|----------------|---------|-----------------------------------------------------------------------------------------------------|-------------------|---------------|--------------|---------------------|
| X.             | J00-J99 | Diseases of the respiratory system                                                                  | 3 ↗ 1             | 8.56%         | 27.00%       | 18.44%              |
| IX.            | I00-I99 | Diseases of the circulatory system                                                                  | 2 → 2             | 10.96%        | 17.38%       | 6.42%               |
| VI.            | G00-G99 | Diseases of the nervous system                                                                      | 4 ↗ 3             | 5.31%         | 13.18%       | 7.87%               |
| V.             | F01-F99 | Mental, behavioral, and neurodevelopmental disorders                                                | 10 ↗ 4            | 1.73%         | 11.82%       | 10.09%              |
| ---            | ---     | Unknown                                                                                             | 16 ↗ 5            | 0.00%         | 5.65%        | 5.65%               |
| XX.            | V00-Y99 | External causes of mortality                                                                        | 5 ↘ 6             | 2.79%         | 3.86%        | 1.07%               |
| IV.            | E00-E89 | Endocrine, nutritional and metabolic diseases                                                       | 7 → 7             | 2.15%         | 3.84%        | 1.69%               |
| XVIII.         | R00-R99 | Symptoms, signs and abnormal clinical and laboratory findings, not elsewhere classified             | 15 ↗ 8            | 0.01%         | 3.23%        | 3.22%               |
| I.             | A00-B99 | Certain infectious and parasitic diseases                                                           | 6 ↘ 9             | 2.32%         | 3.12%        | 0.80%               |
| XIV.           | N00-N99 | Diseases of the genitourinary system                                                                | 11 ↗ 10           | 1.29%         | 2.56%        | 1.27%               |
| XVII.          | Q00-Q99 | Congenital malformations, deformations, and chromosomal abnormalities*                              | 1 ↘ 11            | 60.27%        | 2.51%        | -57.76%             |
| XI.            | K00-K95 | Diseases of the digestive system                                                                    | 9 ↘ 12            | 1.78%         | 2.24%        | 0.46%               |
| II.            | C00-D49 | Neoplasms                                                                                           | 8 ↘ 13            | 2.10%         | 2.12%        | 0.02%               |
| XIII.          | M00-M99 | Diseases of the musculoskeletal system and connective tissue                                        | 12 ↘ 14           | 0.35%         | 0.52%        | 0.17%               |
| III.           | D50-D89 | Diseases of the blood and blood-forming organs and certain disorders involving the immune mechanism | 13 ↘ 15           | 0.26%         | 0.49%        | 0.23%               |
| XII.           | L00-L99 | Diseases of the skin and subcutaneous tissue                                                        | 14 ↘ 16           | 0.11%         | 0.46%        | 0.35%               |
| XVI.           | P00-P96 | Certain conditions originating in the perinatal period                                              | 16 ↘ 17           | 0.00%         | 0.02%        | 0.02%               |
| VIII.          | H60-H95 | Diseases of the ear and mastoid process                                                             | 15 ↘ 18           | 0.01%         | 0.01%        | 0.00%               |

\*Indicates ICD-10 Chapter inclusive of Down syndrome.

Table 4: UCOD (UCOD) trends for decedents with other developmental disabilities, 2012-2016 U.S. Multiple Cause-of-Death Mortality files (N=2,479)

| ICD-10 Chapter |         |                                                                                                     | Rank order change | Original UCOD | Revised UCOD | Absolute Difference |
|----------------|---------|-----------------------------------------------------------------------------------------------------|-------------------|---------------|--------------|---------------------|
| IX.            | I00-I99 | Diseases of the circulatory system                                                                  | 2 ↗ 1             | 15.97%        | 19.48%       | 3.51%               |
| X.             | J00-J99 | Diseases of the respiratory system                                                                  | 5 ↗ 2             | 8.67%         | 16.30%       | 7.63%               |
| II.            | C00-D49 | Neoplasms                                                                                           | 4 ↗ 3             | 11.29%        | 11.42%       | 0.13%               |
| XX.            | V00-Y99 | External causes of mortality                                                                        | 7 ↗ 4             | 7.34%         | 8.75%        | 1.41%               |
| VI.            | G00-G99 | Diseases of the nervous system                                                                      | 6 ↗ 5             | 7.42%         | 8.39%        | 0.97%               |
| IV.            | E00-E89 | Endocrine, nutritional and metabolic diseases                                                       | 8 ↗ 6             | 5.77%         | 6.53%        | 0.76%               |
| XI.            | K00-K95 | Diseases of the digestive system                                                                    | 9 ↗ 7             | 5.16%         | 5.81%        | 0.65%               |
| ---            | ---     | Unknown                                                                                             | 17 ↗ 8            | 0.00%         | 4.88%        | 4.88%               |
| V.             | F01-F99 | Mental, behavioral, and neurodevelopmental disorders*                                               | 1 ↘ 9             | 17.39%        | 3.87%        | -13.52%             |
| XVIII.         | R00-R99 | Symptoms, signs, and abnormal clinical and laboratory findings, not elsewhere classified            | 15 ↗ 10           | 0.12%         | 3.63%        | 3.51%               |
| I.             | A00-B99 | Certain infectious and parasitic diseases                                                           | 10 ↘ 11           | 2.70%         | 3.03%        | 0.33%               |
| XVII.          | Q00-Q99 | Congenital malformations, deformations, and chromosomal abnormalities*                              | 3 ↘ 12            | 14.44%        | 2.99%        | -11.45%             |
| XIV.           | N00-N99 | Diseases of the genitourinary system                                                                | 11 ↘ 13           | 1.69%         | 2.38%        | 0.69%               |
| XIII.          | M00-M99 | Diseases of the musculoskeletal system and connective tissue                                        | 12 ↘ 14           | 0.93%         | 1.17%        | 0.24%               |
| III.           | D50-D89 | Diseases of the blood and blood-forming organs and certain disorders involving the immune mechanism | 13 ↘ 15           | 0.69%         | 0.85%        | 0.16%               |
| XII.           | L00-L99 | Diseases of the skin and subcutaneous tissue                                                        | 14 ↘ 16           | 0.24%         | 0.36%        | 0.12%               |
| XVI.           | P00-P96 | Certain conditions originating in the perinatal period                                              | 16 ↘ 17           | 0.08%         | 0.08%        | 0.00%               |
| XV.            | O00-O9A | Pregnancy, childbirth and the puerperium                                                            | 16 ↘ 17           | 0.08%         | 0.08%        | 0.00%               |

\*Indicates ICD-10 Chapter inclusive of other developmental disabilities.

1  
2  
3  
4  
5  
6  
7  
8  
9  
10  
11  
12  
13  
14  
15  
16  
17  
18  
19  
20  
21  
22  
23  
24  
25  
26  
27  
28  
29  
30  
31  
32  
33  
34  
35  
36  
37  
38  
39  
40  
41  
42  
43  
44  
45  
46  
47

Table 5: UCOD (UCOD) trends for decedents with multiple developmental disabilities, 2012-2016 U.S. Multiple Cause-of-Death Mortality files (N=1,765)

| ICD-10 Chapter |         |                                                                                                     | Rank order change | Original UCOD | Revised UCOD | Absolute Difference |
|----------------|---------|-----------------------------------------------------------------------------------------------------|-------------------|---------------|--------------|---------------------|
| X.             | J00-J99 | Diseases of the respiratory system                                                                  | 3 ↗ 1             | 12.01%        | 29.24%       | 17.23%              |
| IX.            | I00-I99 | Diseases of the circulatory system                                                                  | 5 ↗ 2             | 9.18%         | 16.03%       | 6.85%               |
| VI.            | G00-G99 | Diseases of the nervous system*                                                                     | 1 ↘ 3             | 32.24%        | 7.42%        | -24.82%             |
| XI.            | K00-K95 | Diseases of the digestive system                                                                    | 6 ↗ 4             | 5.89%         | 6.80%        | 0.91%               |
| XVIII.         | R00-R99 | Symptoms, signs, and abnormal clinical and laboratory findings, not elsewhere classified            | 15 ↗ 5            | 0.00%         | 6.35%        | 6.35%               |
| XX.            | V00-Y99 | External causes of mortality                                                                        | 10 ↗ 6            | 1.76%         | 6.06%        | 4.30%               |
| ---            | ---     | Unknown                                                                                             | 15 ↗ 7            | 0.00%         | 5.16%        | 5.16%               |
| I.             | A00-B99 | Certain infectious and parasitic diseases                                                           | 8 → 8             | 3.34%         | 4.42%        | 1.08%               |
| II.            | C00-D49 | Neoplasms                                                                                           | 7 ↘ 9             | 4.25%         | 4.31%        | 0.06%               |
| IV.            | E00-E89 | Endocrine, nutritional and metabolic diseases                                                       | 9 ↘ 10            | 1.98%         | 3.63%        | 1.65%               |
| XIV.           | N00-N99 | Diseases of the genitourinary system                                                                | 11 → 11           | 1.19%         | 3.06%        | 1.87%               |
| V.             | F01-F99 | Mental, behavioral, and neurodevelopmental disorders*                                               | 4 ↘ 12            | 11.22%        | 2.89%        | -8.33%              |
| XVII.          | Q00-Q99 | Congenital malformations, deformations, and chromosomal abnormalities*                              | 2 ↘ 13            | 15.81%        | 2.49%        | -13.32%             |
| XIII.          | M00-M99 | Diseases of the musculoskeletal system and connective tissue                                        | 12 ↘ 14           | 0.74%         | 1.25%        | 0.51%               |
| XII.           | L00-L99 | Diseases of the skin and subcutaneous tissue                                                        | 15 → 15           | 0.00%         | 0.45%        | 0.45%               |
| III.           | D50-D89 | Diseases of the blood and blood-forming organs and certain disorders involving the immune mechanism | 13 ↘ 16           | 0.28%         | 0.34%        | 0.06%               |
| XVI.           | P00-P96 | Certain conditions originating in the perinatal period                                              | 14 ↘ 17           | 0.11%         | 0.11%        | 0.00%               |

\*Indicates ICD-10 Chapter inclusive of multiple developmental disabilities.

**STROBE 2007 (v4) Statement—Checklist of items that should be included in reports of *cross-sectional studies***

| Section/Topic                | Item # | Recommendation                                                                                                                                                                       | Reported on page # |
|------------------------------|--------|--------------------------------------------------------------------------------------------------------------------------------------------------------------------------------------|--------------------|
| <b>Title and abstract</b>    | 1      | (a) Indicate the study's design with a commonly used term in the title or the abstract                                                                                               | 1                  |
|                              |        | (b) Provide in the abstract an informative and balanced summary of what was done and what was found                                                                                  | 2                  |
| <b>Introduction</b>          |        |                                                                                                                                                                                      |                    |
| Background/rationale         | 2      | Explain the scientific background and rationale for the investigation being reported                                                                                                 | 4-6                |
| Objectives                   | 3      | State specific objectives, including any prespecified hypotheses                                                                                                                     | 6                  |
| <b>Methods</b>               |        |                                                                                                                                                                                      |                    |
| Study design                 | 4      | Present key elements of study design early in the paper                                                                                                                              | 6-7                |
| Setting                      | 5      | Describe the setting, locations, and relevant dates, including periods of recruitment, exposure, follow-up, and data collection                                                      | 6                  |
| Participants                 | 6      | (a) Give the eligibility criteria, and the sources and methods of selection of participants                                                                                          | 6                  |
| Variables                    | 7      | Clearly define all outcomes, exposures, predictors, potential confounders, and effect modifiers. Give diagnostic criteria, if applicable                                             | 6-7                |
| Data sources/<br>measurement | 8*     | For each variable of interest, give sources of data and details of methods of assessment (measurement). Describe comparability of assessment methods if there is more than one group | 6                  |
| Bias                         | 9      | Describe any efforts to address potential sources of bias                                                                                                                            | 6                  |
| Study size                   | 10     | Explain how the study size was arrived at                                                                                                                                            | 6                  |
| Quantitative variables       | 11     | Explain how quantitative variables were handled in the analyses. If applicable, describe which groupings were chosen and why                                                         | 6                  |
| Statistical methods          | 12     | (a) Describe all statistical methods, including those used to control for confounding                                                                                                | 6-7                |
|                              |        | (b) Describe any methods used to examine subgroups and interactions                                                                                                                  | 6-7                |
|                              |        | (c) Explain how missing data were addressed                                                                                                                                          | NA                 |
|                              |        | (d) If applicable, describe analytical methods taking account of sampling strategy                                                                                                   | NA                 |
|                              |        | (e) Describe any sensitivity analyses                                                                                                                                                | NA                 |
| <b>Results</b>               |        |                                                                                                                                                                                      |                    |

|                          |     |                                                                                                                                                                                                              |       |
|--------------------------|-----|--------------------------------------------------------------------------------------------------------------------------------------------------------------------------------------------------------------|-------|
| Participants             | 13* | (a) Report numbers of individuals at each stage of study—eg numbers potentially eligible, examined for eligibility, confirmed eligible, included in the study, completing follow-up, and analysed            | 7-8   |
|                          |     | (b) Give reasons for non-participation at each stage                                                                                                                                                         | NA    |
|                          |     | (c) Consider use of a flow diagram                                                                                                                                                                           | NA    |
| Descriptive data         | 14* | (a) Give characteristics of study participants (eg demographic, clinical, social) and information on exposures and potential confounders                                                                     | 7-8   |
|                          |     | (b) Indicate number of participants with missing data for each variable of interest                                                                                                                          | NA    |
| Outcome data             | 15* | Report numbers of outcome events or summary measures                                                                                                                                                         | 7-8   |
| Main results             | 16  | (a) Give unadjusted estimates and, if applicable, confounder-adjusted estimates and their precision (eg, 95% confidence interval). Make clear which confounders were adjusted for and why they were included | 7-10  |
|                          |     | (b) Report category boundaries when continuous variables were categorized                                                                                                                                    | NA    |
|                          |     | (c) If relevant, consider translating estimates of relative risk into absolute risk for a meaningful time period                                                                                             | NA    |
| Other analyses           | 17  | Report other analyses done—eg analyses of subgroups and interactions, and sensitivity analyses                                                                                                               | NA    |
| <b>Discussion</b>        |     |                                                                                                                                                                                                              |       |
| Key results              | 18  | Summarise key results with reference to study objectives                                                                                                                                                     | 10    |
| Limitations              | 19  | Discuss limitations of the study, taking into account sources of potential bias or imprecision. Discuss both direction and magnitude of any potential bias                                                   | 11-12 |
| Interpretation           | 20  | Give a cautious overall interpretation of results considering objectives, limitations, multiplicity of analyses, results from similar studies, and other relevant evidence                                   | 11-12 |
| Generalisability         | 21  | Discuss the generalisability (external validity) of the study results                                                                                                                                        | 13    |
| <b>Other information</b> |     |                                                                                                                                                                                                              |       |
| Funding                  | 22  | Give the source of funding and the role of the funders for the present study and, if applicable, for the original study on which the present article is based                                                | 14    |

\*Give information separately for cases and controls in case-control studies and, if applicable, for exposed and unexposed groups in cohort and cross-sectional studies.

**Note:** An Explanation and Elaboration article discusses each checklist item and gives methodological background and published examples of transparent reporting. The STROBE checklist is best used in conjunction with this article (freely available on the Web sites of PLoS Medicine at <http://www.plosmedicine.org/>, Annals of Internal Medicine at <http://www.annals.org/>, and Epidemiology at <http://www.epidem.com/>). Information on the STROBE Initiative is available at [www.strobe-statement.org](http://www.strobe-statement.org).
